# Supplementary material for: Identification of N-Acyl Hydrazones as New Non-Zinc-Binding MMP-13 Inhibitors by Structure-Based Virtual Screening Studies and Chemical Optimization
Source: MDPI journal article supplement (doi:10.3390/ijms241311098), 2023-07-04

**SUPPORTING INFORMATION FOR**

**Identification of N-Acyl Hydrazones as New Non-Zinc-Binding MMP-13 Inhibitors  
by Structure-Based Virtual Screening Studies and Chemical Optimization**

**Content:**

|                                       |            |
|---------------------------------------|------------|
| <b>I. Combustion data analysis</b>    | <b>S2</b>  |
| <b>II. Supplementary figures</b>      | <b>S3</b>  |
| <b>III. References</b>                | <b>S10</b> |
| <b>IV. Representative NMR spectra</b> | <b>S11</b> |
| <b>V. Representative HRMS spectra</b> | <b>S25</b> |

**Table S1. Combustion analysis data of final compounds 13, 13a-o.**

| Compound   | Formula                                                         | Calculated |      |       | Found |      |       |
|------------|-----------------------------------------------------------------|------------|------|-------|-------|------|-------|
|            |                                                                 | % C        | % H  | % N   | % C   | % H  | % N   |
| <b>13</b>  | C <sub>21</sub> H <sub>17</sub> BrN <sub>4</sub> O <sub>5</sub> | 51.97      | 3.53 | 11.55 | 51.99 | 3.54 | 11.58 |
| <b>13a</b> | C <sub>21</sub> H <sub>19</sub> N <sub>5</sub> O <sub>7</sub> S | 51.96      | 3.95 | 14.43 | 51.98 | 3.99 | 14.45 |
| <b>13b</b> | C <sub>22</sub> H <sub>20</sub> N <sub>4</sub> O <sub>6</sub>   | 60.55      | 4.62 | 12.84 | 60.58 | 4.64 | 12.87 |
| <b>13c</b> | C <sub>20</sub> H <sub>15</sub> BrN <sub>4</sub> O <sub>5</sub> | 50.97      | 3.21 | 11.89 | 51.00 | 3.23 | 11.92 |
| <b>13d</b> | C <sub>21</sub> H <sub>18</sub> N <sub>4</sub> O <sub>6</sub>   | 59.71      | 4.30 | 13.26 | 59.72 | 4.34 | 13.28 |
| <b>13e</b> | C <sub>24</sub> H <sub>20</sub> BrN <sub>5</sub> O <sub>4</sub> | 55.19      | 3.86 | 13.41 | 55.21 | 3.87 | 13.44 |
| <b>13f</b> | C <sub>25</sub> H <sub>23</sub> N <sub>5</sub> O <sub>5</sub>   | 63.42      | 4.90 | 14.79 | 63.45 | 4.92 | 14.80 |
| <b>13g</b> | C <sub>24</sub> H <sub>21</sub> N <sub>5</sub> O <sub>5</sub>   | 62.74      | 4.61 | 15.24 | 62.75 | 4.64 | 15.26 |
| <b>13h</b> | C <sub>22</sub> H <sub>18</sub> BrN <sub>3</sub> O <sub>5</sub> | 54.56      | 3.75 | 8.68  | 51.57 | 3.77 | 8.70  |
| <b>13i</b> | C <sub>23</sub> H <sub>21</sub> N <sub>3</sub> O <sub>6</sub>   | 63.44      | 4.86 | 9.65  | 63.45 | 4.89 | 9.67  |
| <b>13l</b> | C <sub>21</sub> H <sub>16</sub> BrN <sub>3</sub> O <sub>5</sub> | 53.63      | 3.43 | 8.94  | 53.65 | 3.47 | 8.95  |
| <b>13m</b> | C <sub>22</sub> H <sub>18</sub> BrN <sub>3</sub> O <sub>5</sub> | 54.56      | 3.75 | 8.68  | 54.59 | 3.77 | 8.69  |
| <b>13n</b> | C <sub>21</sub> H <sub>16</sub> BrN <sub>7</sub> O <sub>3</sub> | 51.03      | 3.26 | 19.84 | 51.05 | 3.29 | 19.86 |
| <b>13o</b> | C <sub>22</sub> H <sub>18</sub> BrN <sub>7</sub> O <sub>3</sub> | 51.98      | 3.57 | 19.29 | 52.01 | 3.58 | 19.31 |

## II. Supplementary figures

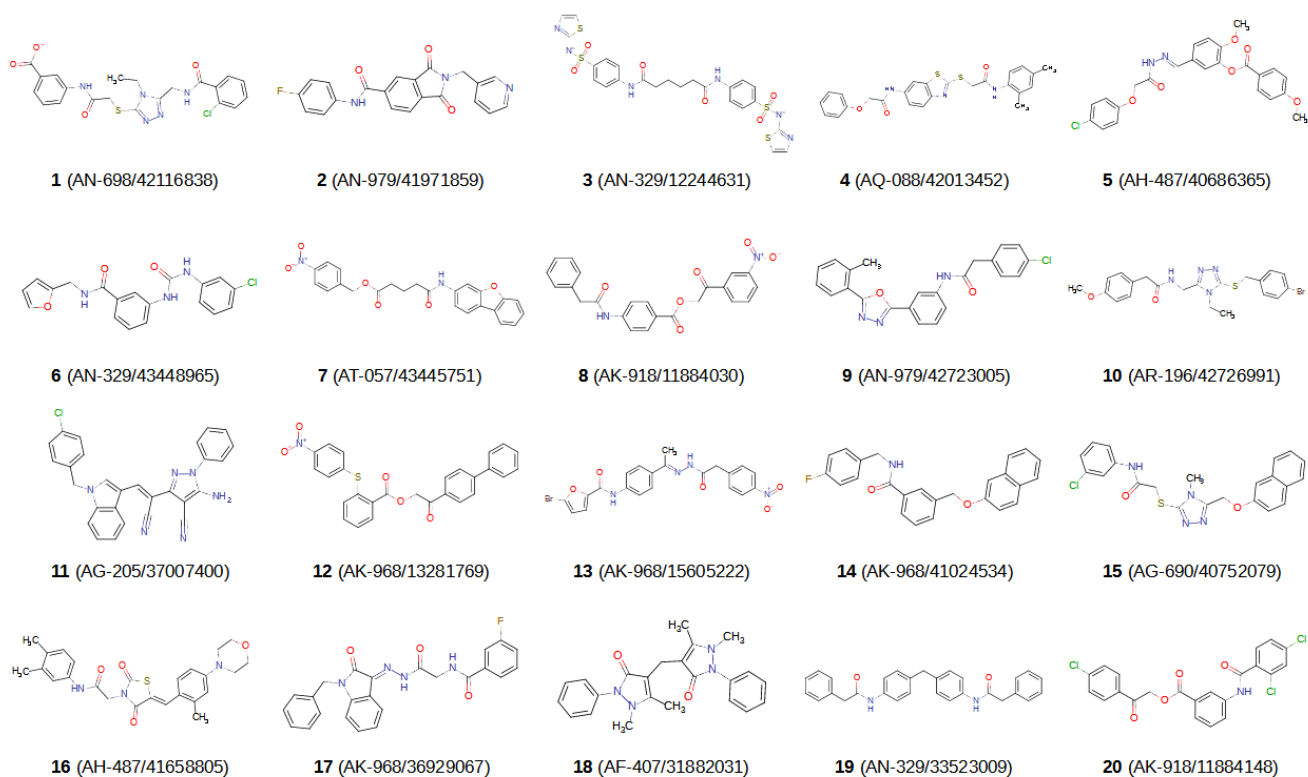

**Figure S1.** 2D structures of the 20 compounds selected for *in vitro* test. Each compound is identified with its Specs ID number. MarvinSketch<sup>1</sup> was used to draw the structures. The protonation state of each compound corresponds to the protonation state of the docked pose selected for that compound.

A)

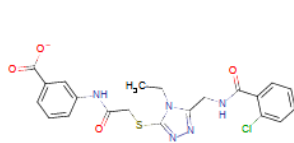

**1** (AN-698/42116838)

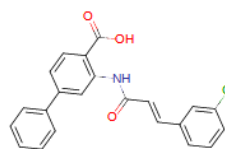

Reaxys RN: 12718029

Tanimoto: 0.39

B)

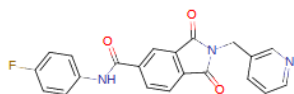

**2** (AN-979/41971859)

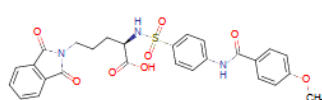

Reaxys RN: 25580841

Tanimoto: 0.45

C)

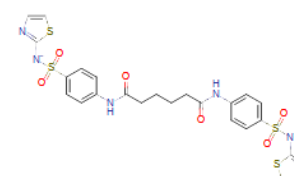

**3** (AN-329/12244631)

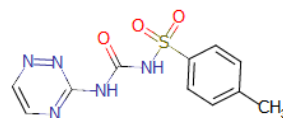

Reaxys RN: 26373808

Tanimoto: 0.32

D)

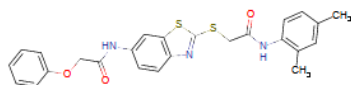

**4** (AQ-088/42013452)

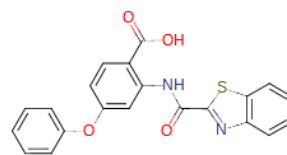

Reaxys RN: 12718003

Tanimoto: 0.41

E)

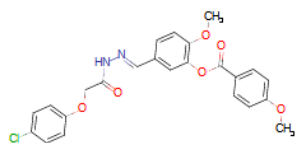

**5** (AH-487/40686365)

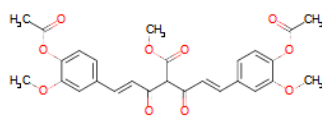

Reaxys RN: 20888062

Tanimoto: 0.42

F)

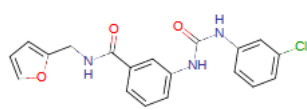

**6** (AN-329/43448965)

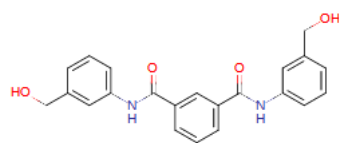

Reaxys RN: 13925759

Tanimoto: 0.49

G)

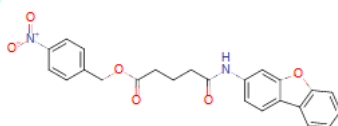

**7** (AT-057/43445751)

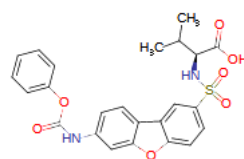

Reaxys RN: 25593517

Tanimoto: 0.42

H)

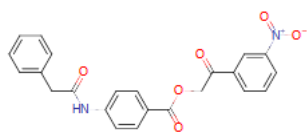

**8** (AK-918/11884030)

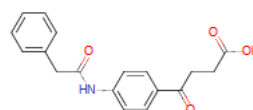

Reaxys RN: 13914187

Tanimoto: 0.54

I)

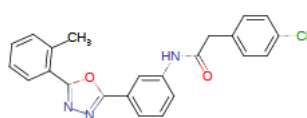

**9** (AN-979/42723005)

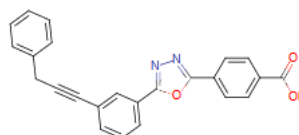

Reaxys RN: 11809753

Tanimoto: 0.49

J)

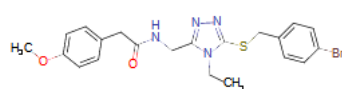

**10** (AR-196/42726991)

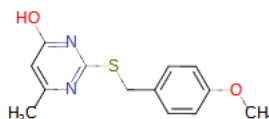

Reaxys RN: 799987

Tanimoto: 0.31

K)

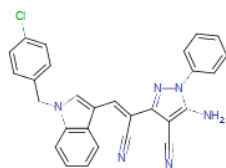

**11** (AG-205/37007400)

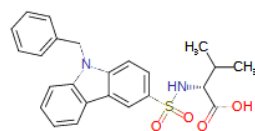

Reaxys RN: 26364583

Tanimoto: 0.43

L)

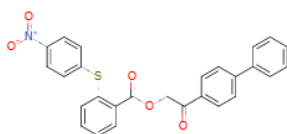

**12** (AK-968/13281769)

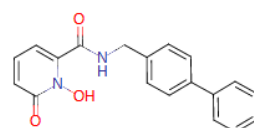

Reaxys RN: 19675912

Tanimoto: 0.38

M)

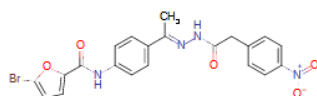

**13** (AK-968/15605222)

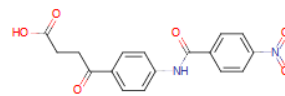

Reaxys RN: 13917890

Tanimoto: 0.43

N)

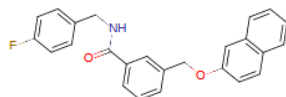

**14** (AK-968/41024534)

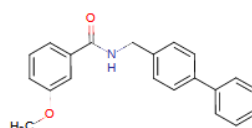

Reaxys RN: 24511368

Tanimoto: 0.71

O)

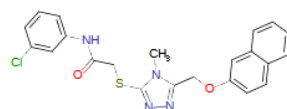

**15** (AG-690/40752079)

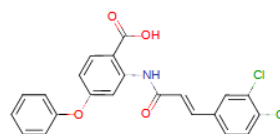

Reaxys RN: 12718197

Tanimoto: 0.47

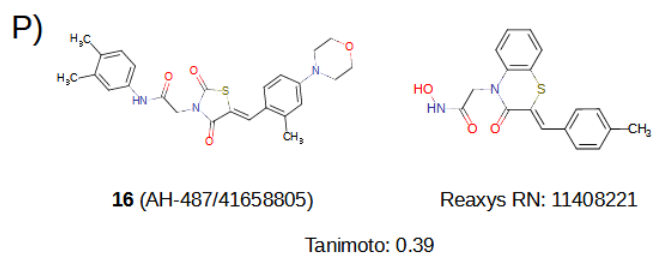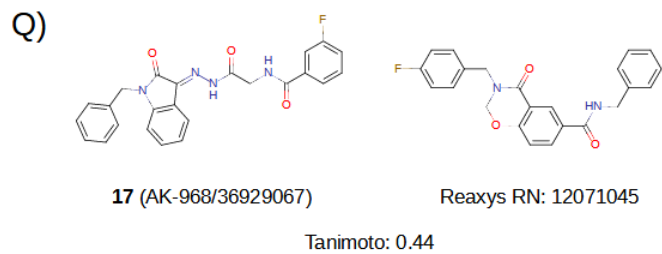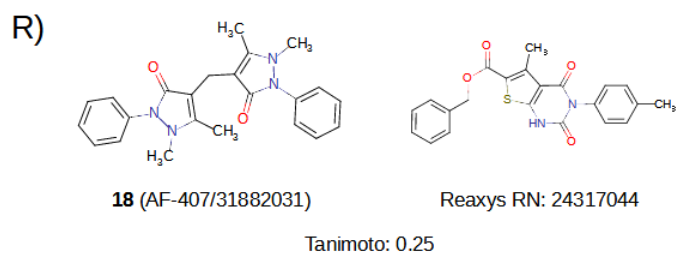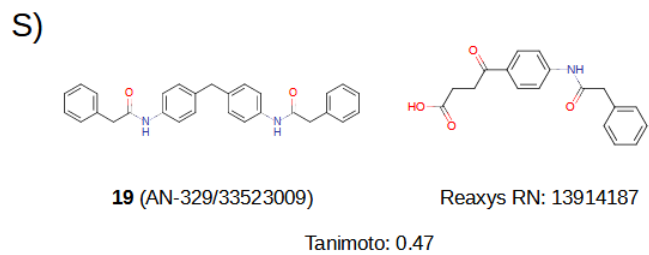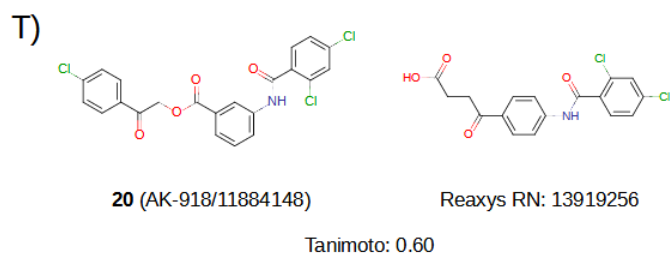

**Figure S2.** In each panel, a hit compound is represented in 2D, together with the most similar active compound found in the Reaxys<sup>2</sup> database, which is labeled with its Reaxys Registry Number. The Tanimoto similarity value resulting from the comparison of the OpenEyePath<sup>3</sup> fingerprint of both compounds is shown below. MarvinSketch<sup>1</sup> was used to draw the structures.

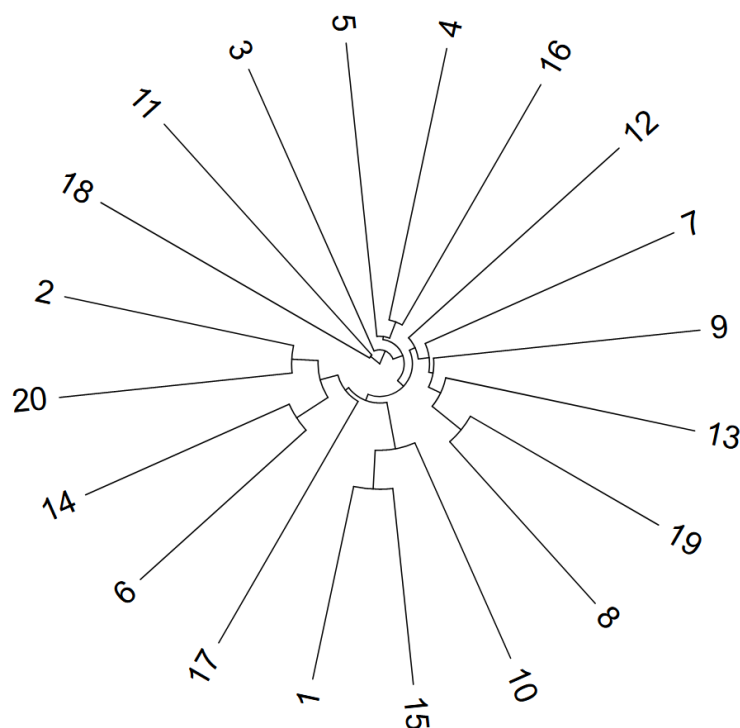

**Figure S3.** Dendrogram based on fingerprints showing the structural diversity of the 20 selected compounds. The fingerprint used to obtain the distance matrix was the OpenEyePath fingerprint.<sup>3</sup> iTOL<sup>4</sup> was used to draw the dendrogram.



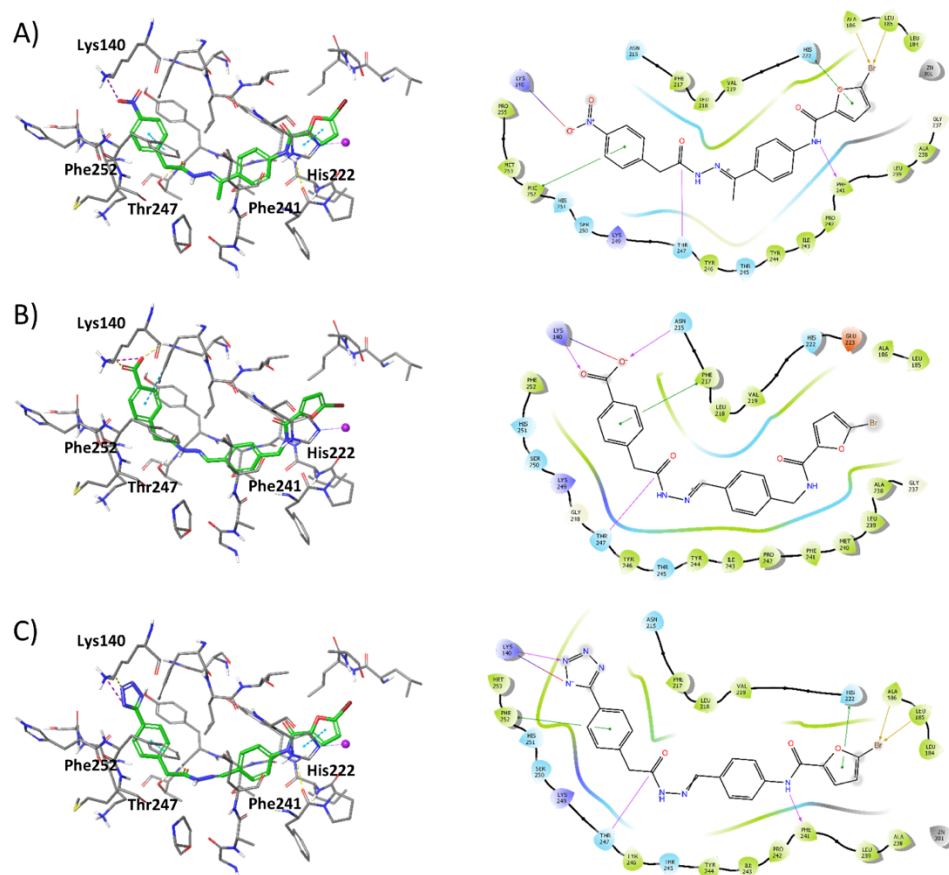

**Figure S4.** Protein-ligand interactions performed by the docked poses of compounds 13, 13m and 13n (panels A, B and C, respectively) with MMP-13. The first picture in each panel shows the intermolecular interactions predicted by docking in 3D (hydrogen bonds are colored in yellow,  $\pi$  stacking interactions are colored in cyan, and salt bridges are colored in magenta). The second picture shows the intermolecular interactions predicted by docking in 2D (hydrogen bonds, halogen bonds,  $\pi$  stacking interactions and salt bridges are represented by magenta arrows, yellow arrows, green lines and red and blue lines, respectively; positively charged, negatively charged, polar and hydrophobic residues are colored in blue, red, cyan and green, respectively). Figure obtained with Maestro (Schrödinger Release 2016-3: Maestro, Schrödinger, LLC, New York, NY, 2016).

### III. References

---

<sup>1</sup> Marvin 16.10.10.0, 2016, ChemAxon <http://www.chemaxon.com>.

<sup>2</sup> Reaxys, <https://www.reaxys.com/>

<sup>3</sup> OpenEye scientific software, OEChem, 2013.

<sup>4</sup> Letunic, I.; Bork, P. Interactive Tree of Life (ITOL) v3: An Online Tool for the Display and Annotation of Phylogenetic and Other Trees. *Nucleic Acids Res.* 2016, 44 (W1), W242-5.

#### IV. Representative NMR spectra

$^1\text{H}$  NMR of compound **13** (400MHz, DMSO- $d_6$ )

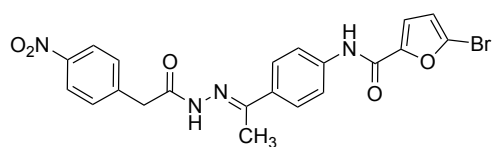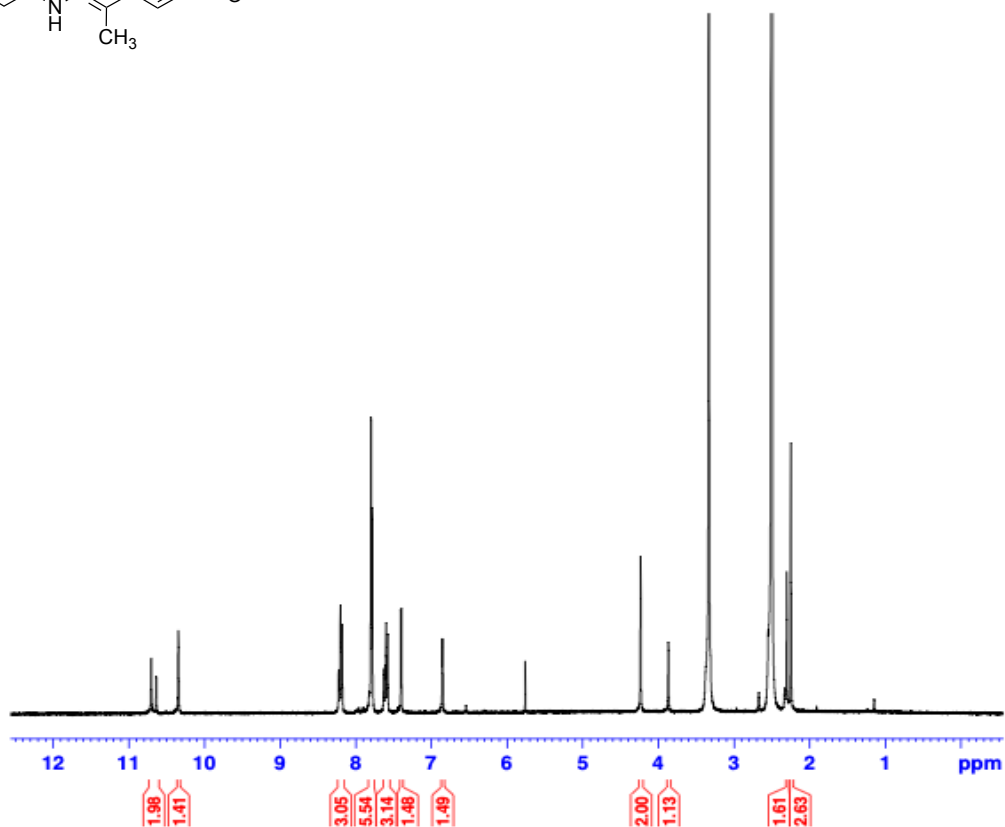

$^{13}\text{C}$  NMR of compound **13** (100MHz, DMSO- $d_6$ )

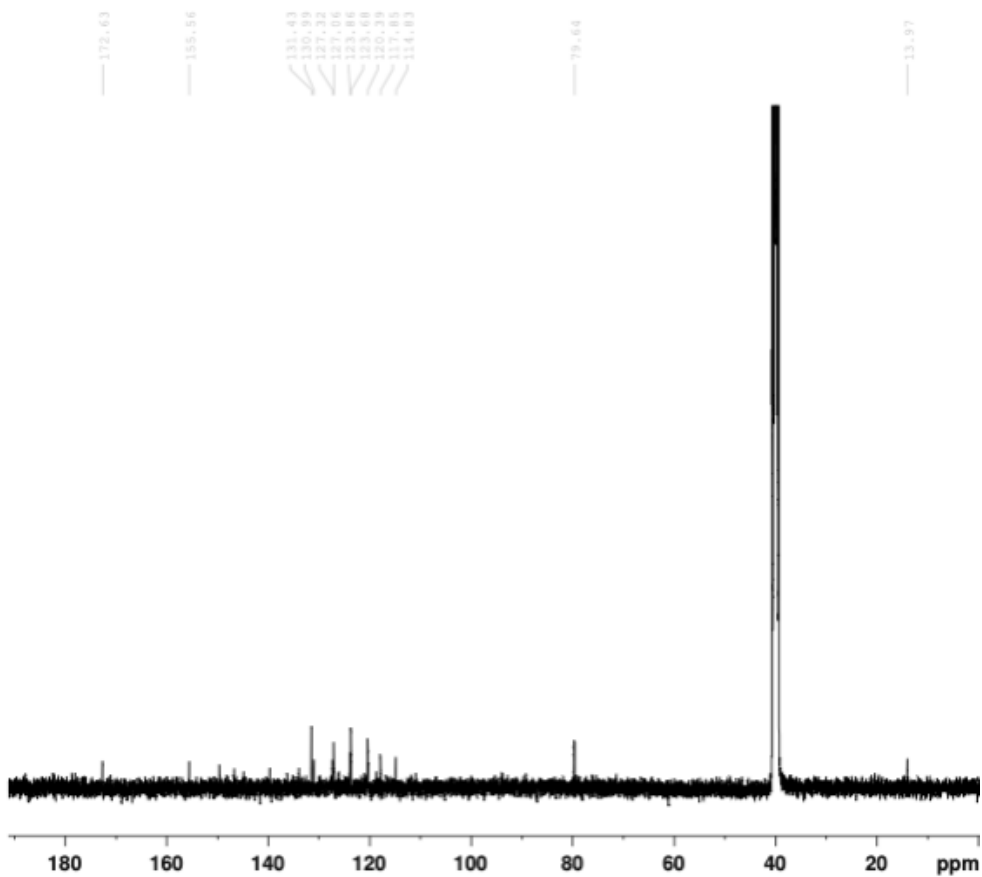

$^1\text{H}$  NMR of compound **13a** (400MHz, DMSO- $d_6$ )

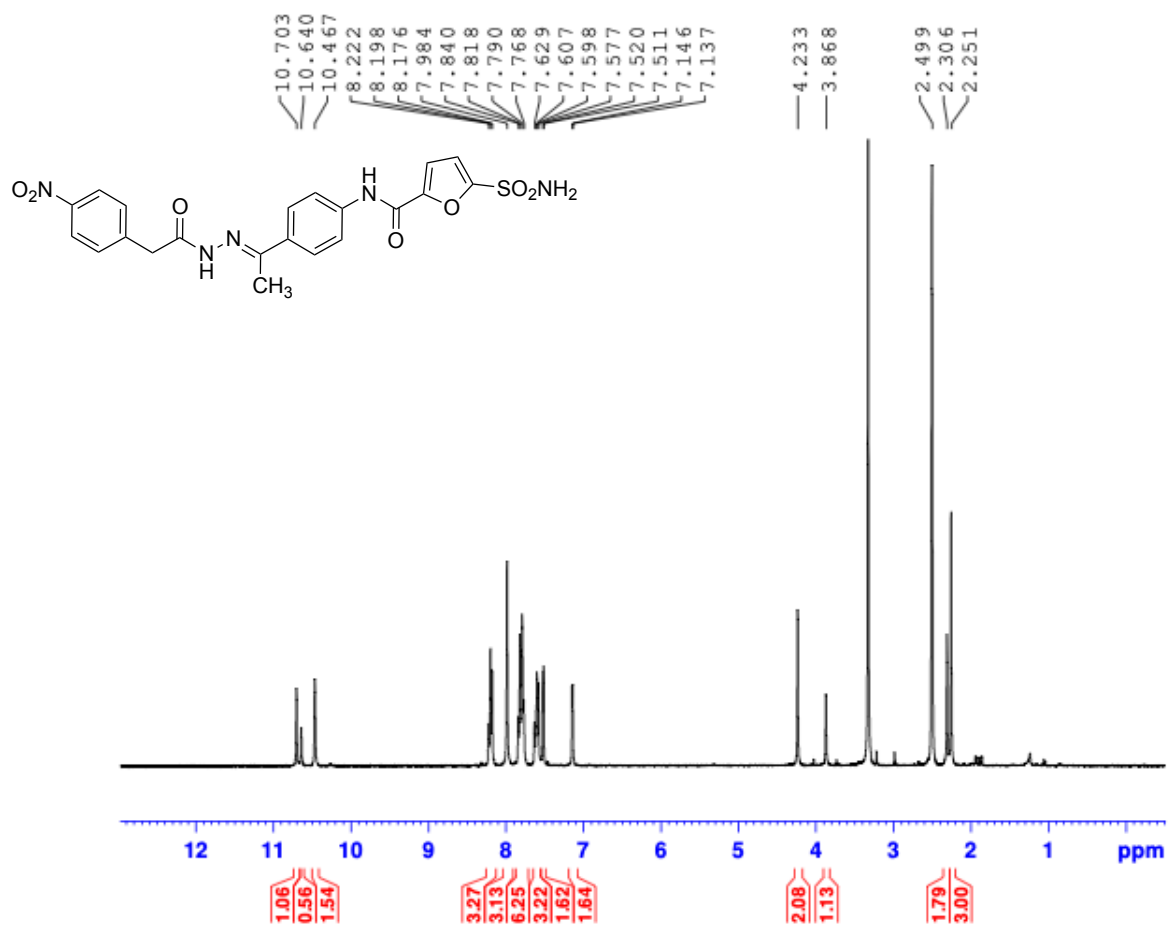

$^{13}\text{C}$  NMR of compound **13a** (100MHz, DMSO- $d_6$ )

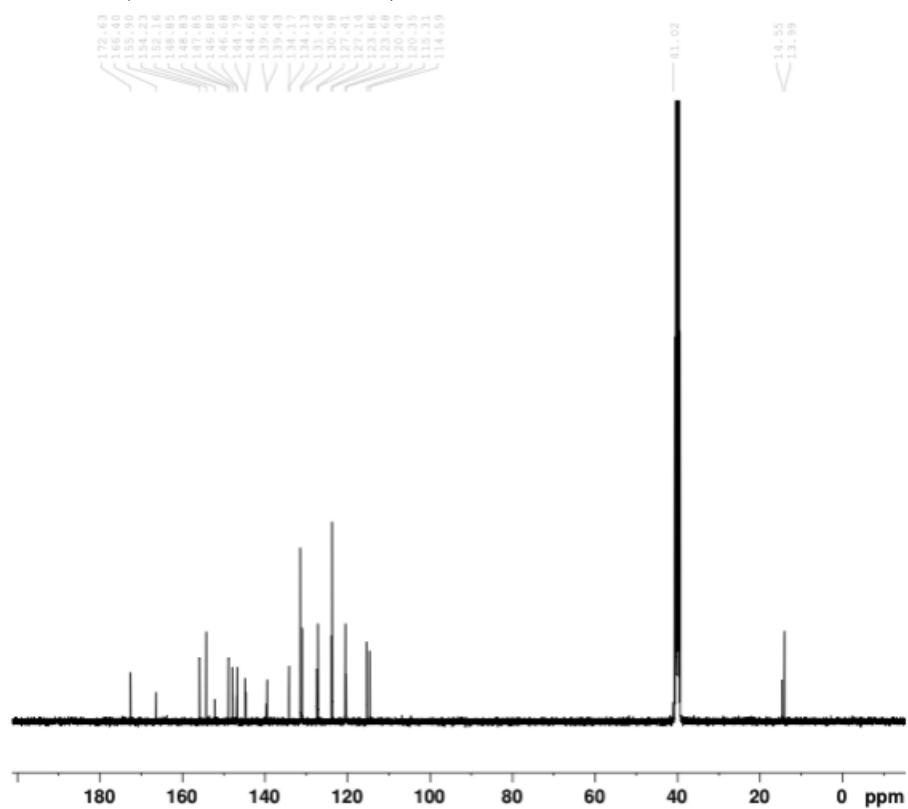

$^1\text{H}$  NMR of compound **13b** (400MHz, DMSO- $d_6$ )

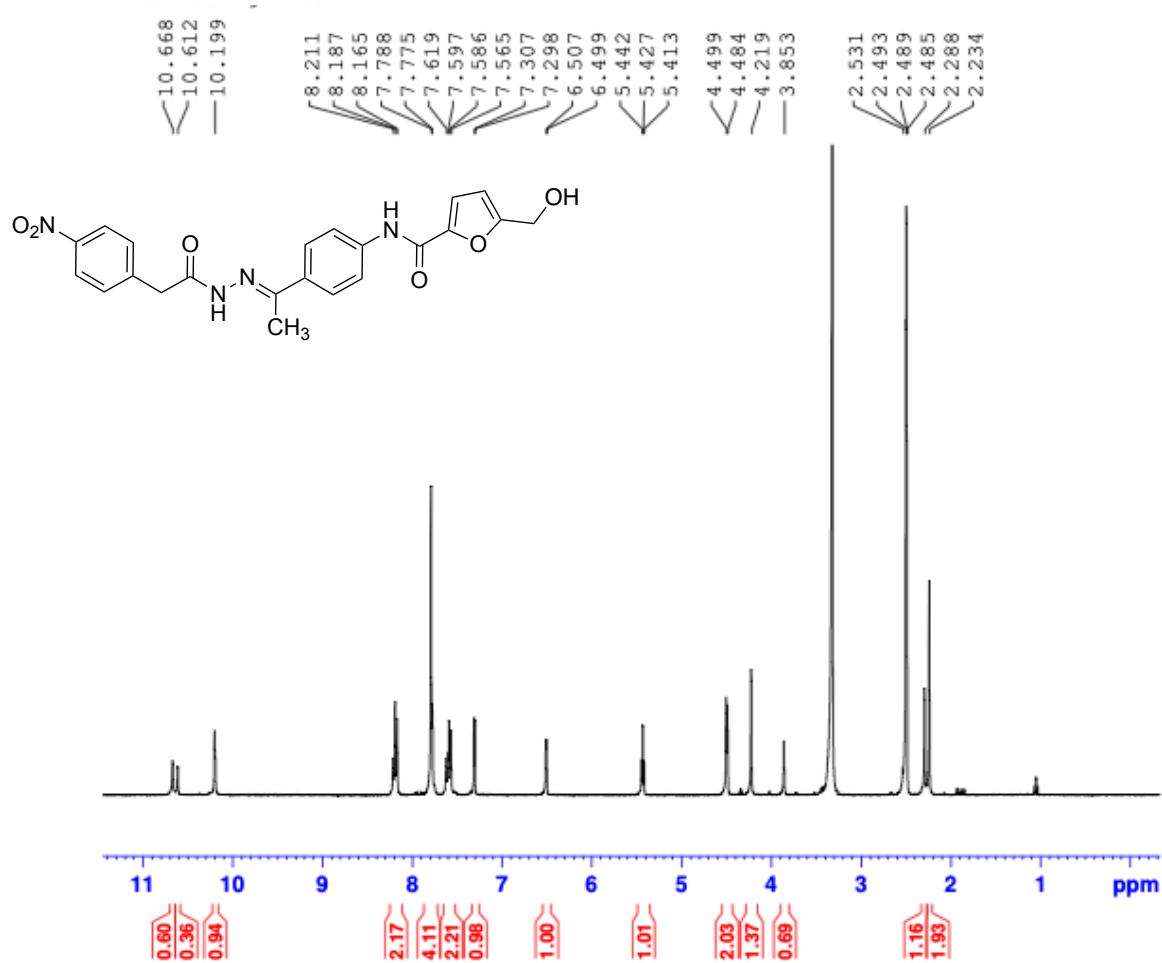

$^{13}\text{C}$  NMR of compound **13b** (100MHz, DMSO- $d_6$ )

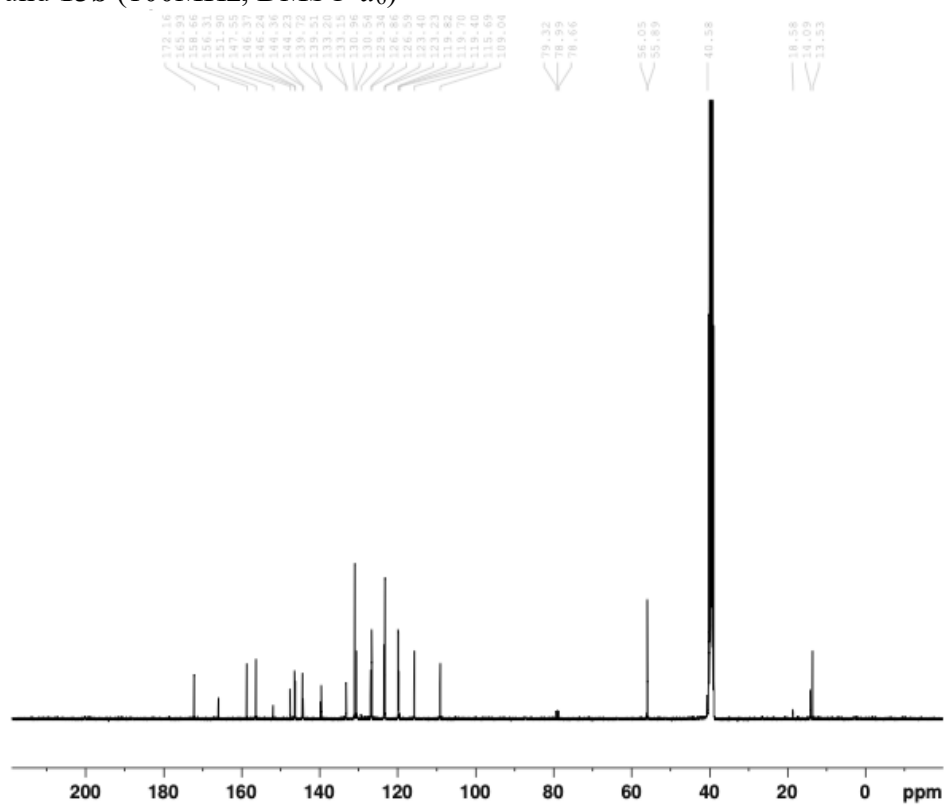

$^1\text{H}$  NMR of compound **13c** (400MHz,  $\text{DMSO-}d_6$ )

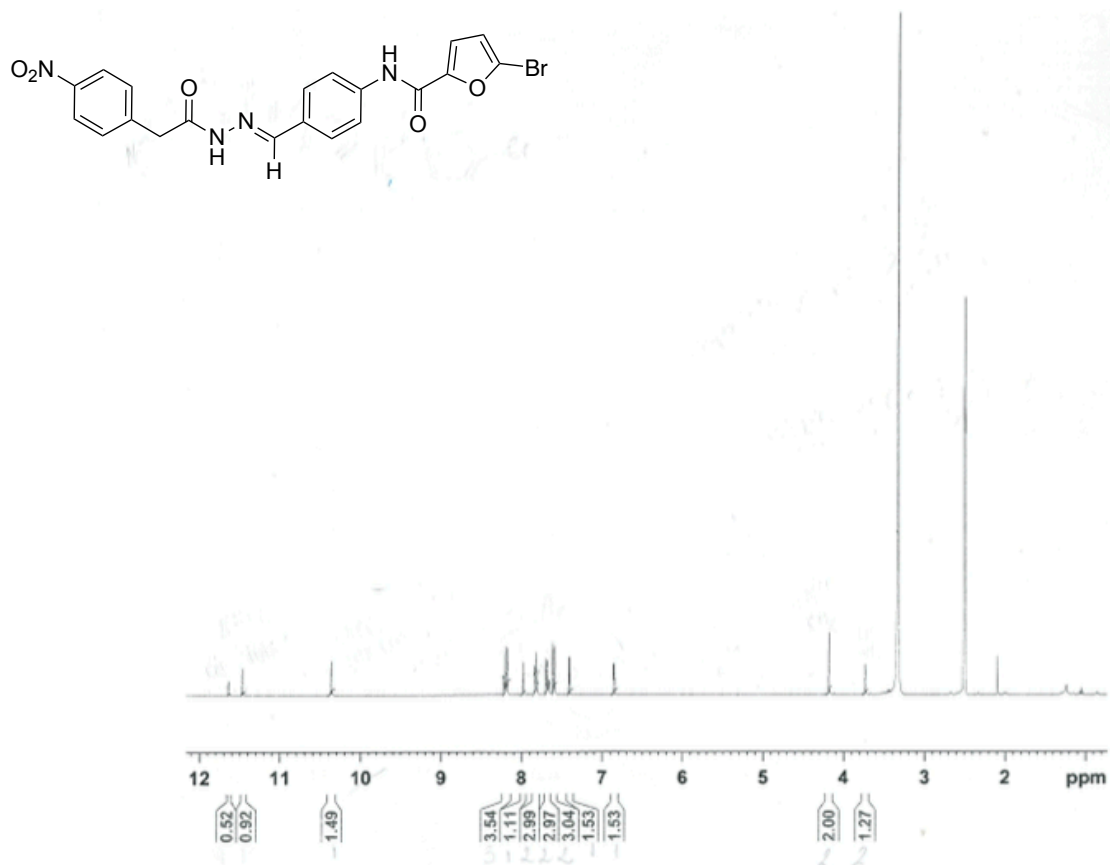

$^{13}\text{C}$  NMR of compound **13c** (100MHz,  $\text{DMSO-}d_6$ )

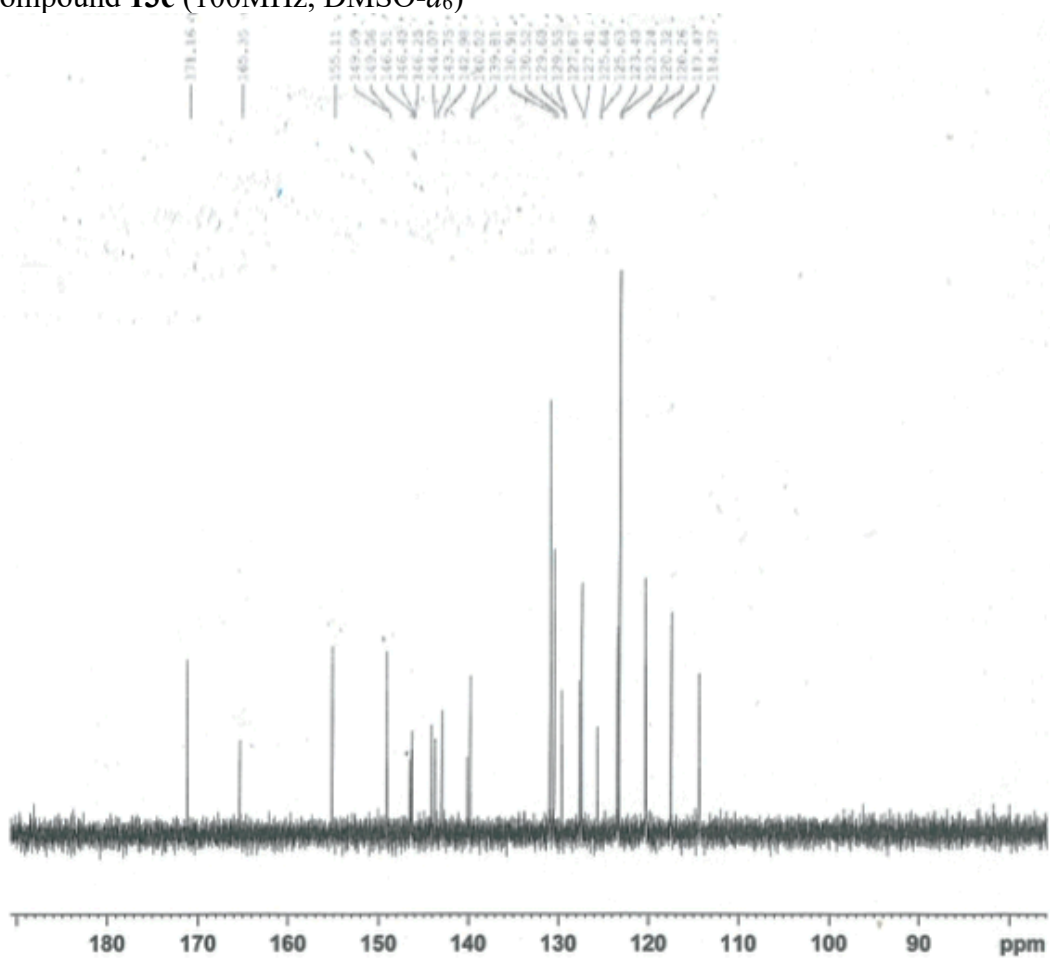

$^1\text{H}$  NMR of compound **13d** (400MHz, DMSO- $d_6$ )

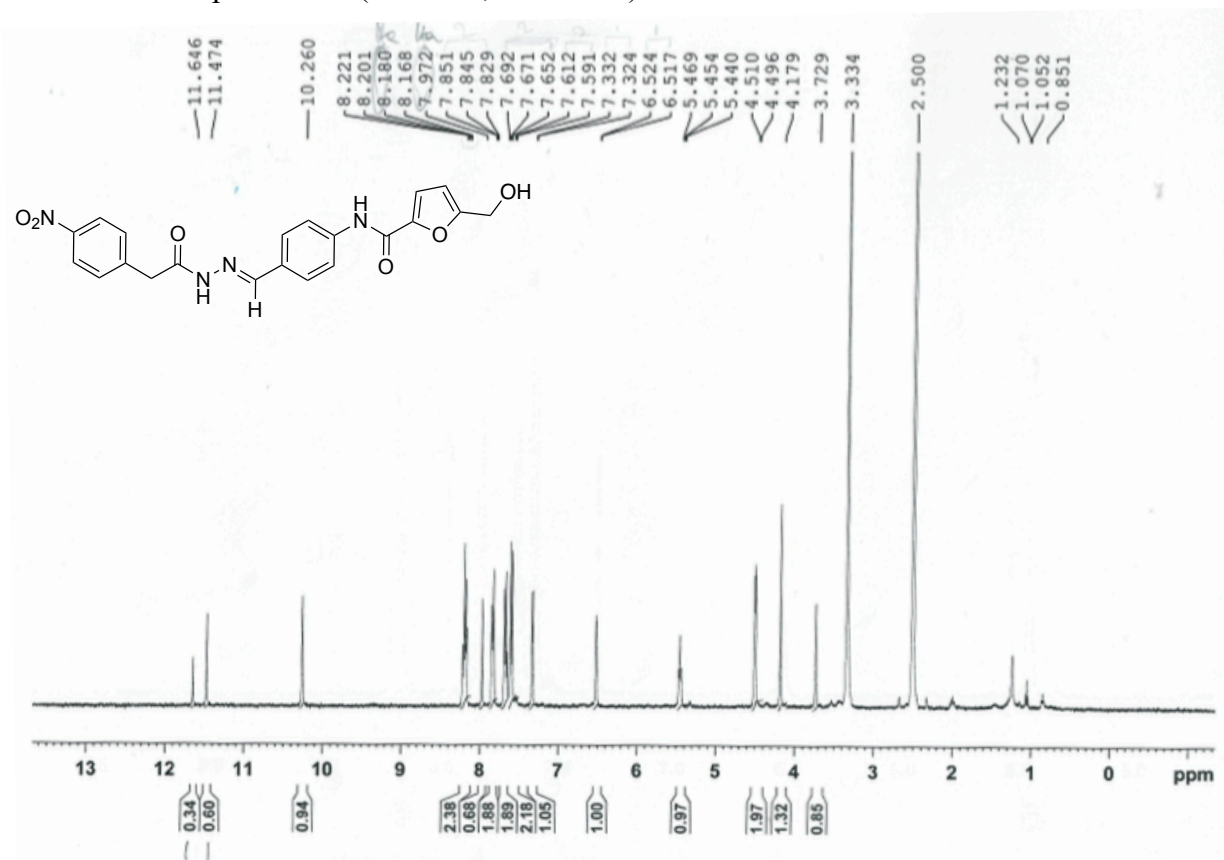

$^{13}\text{C}$  NMR of compound **13d** (100MHz, DMSO- $d_6$ )

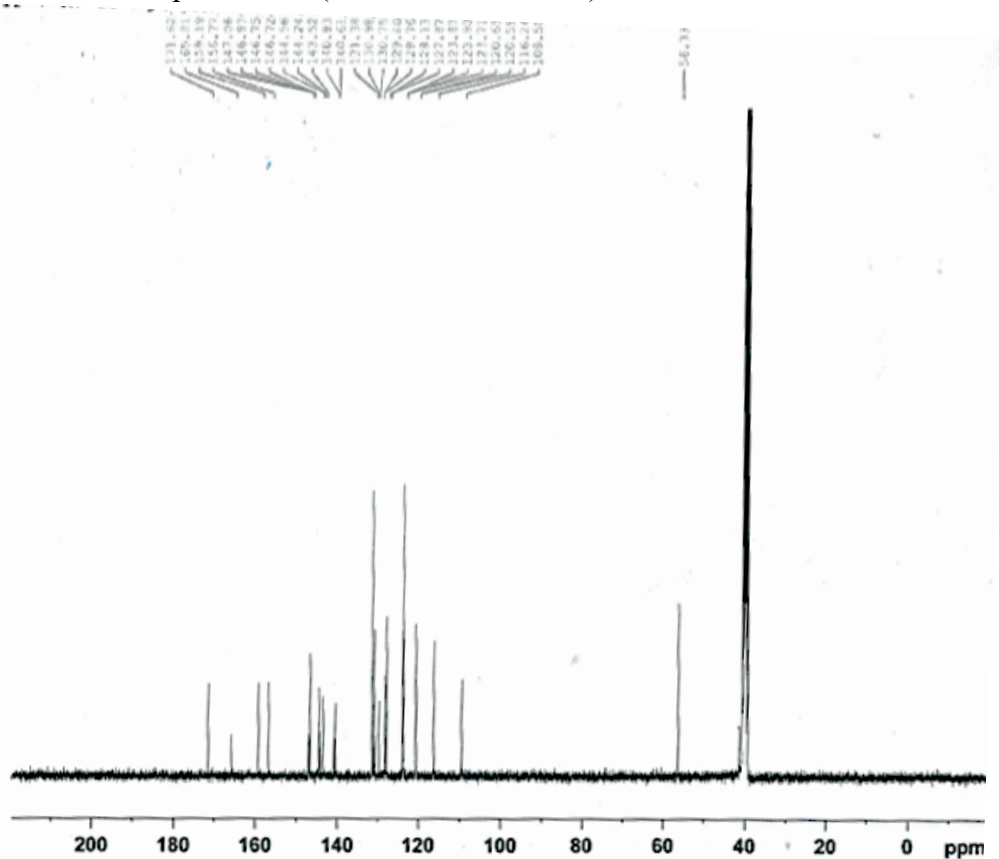

$^1\text{H}$  NMR of compound **13e** (400MHz,  $\text{DMSO}-d_6$ )

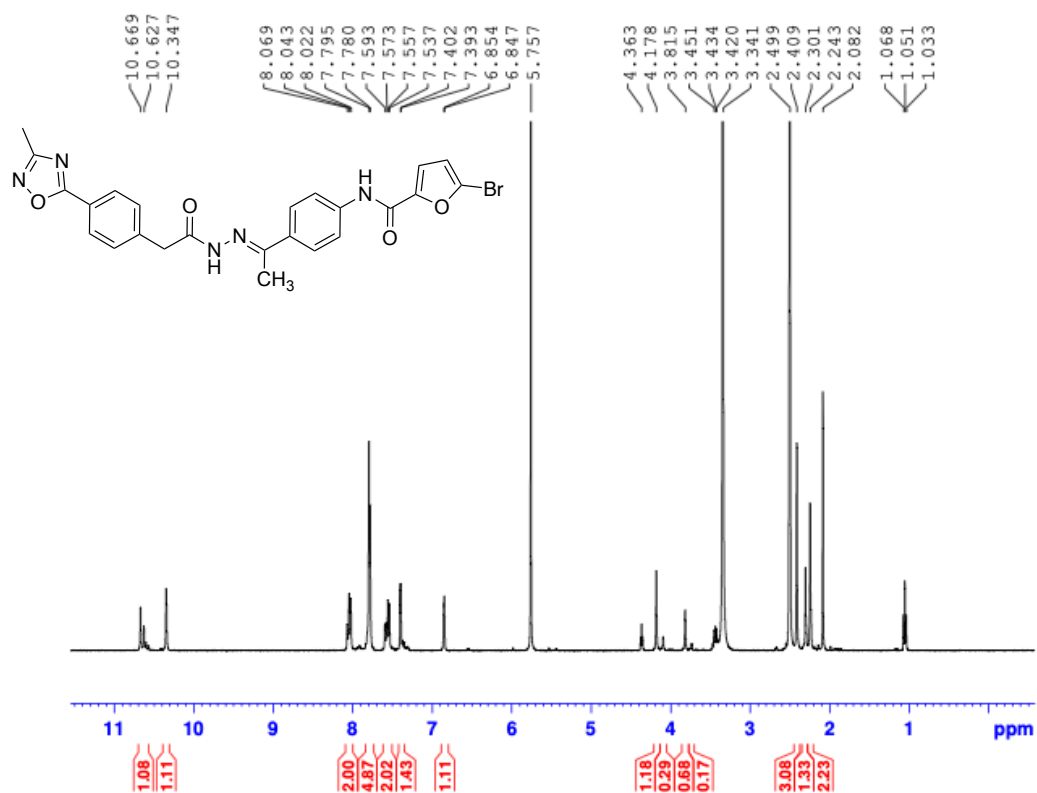

$^{13}\text{C}$  NMR of compound **13e** (100MHz,  $\text{DMSO}-d_6$ )

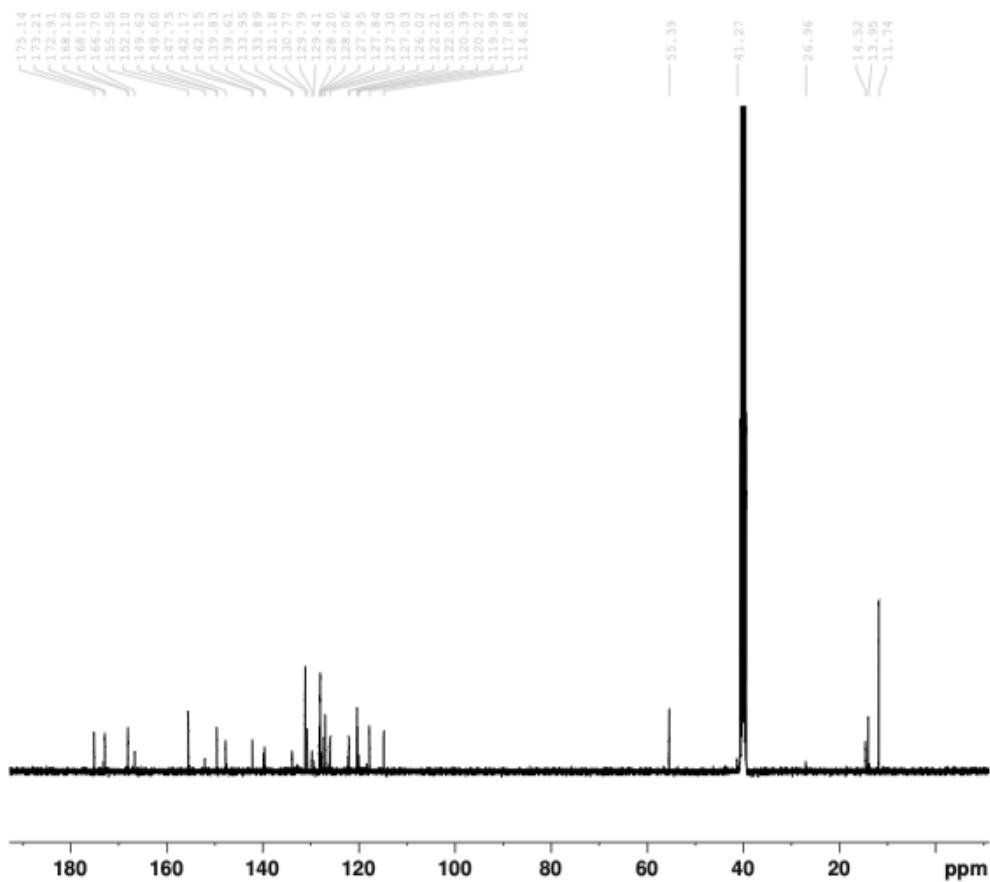



$^1\text{H}$  NMR of compound **13f** (400MHz,  $\text{DMSO}-d_6$ )

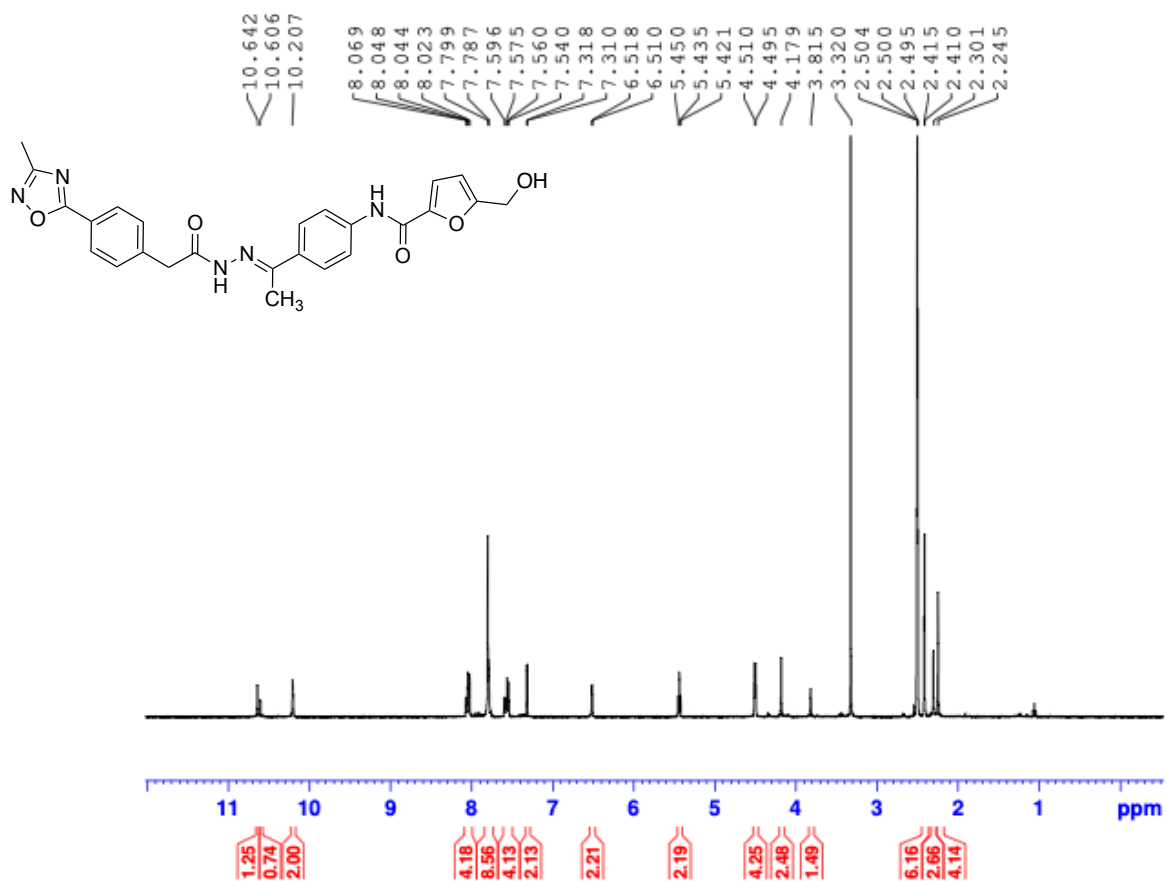

$^{13}\text{C}$  NMR of compound **13f** (100MHz,  $\text{DMSO}-d_6$ )

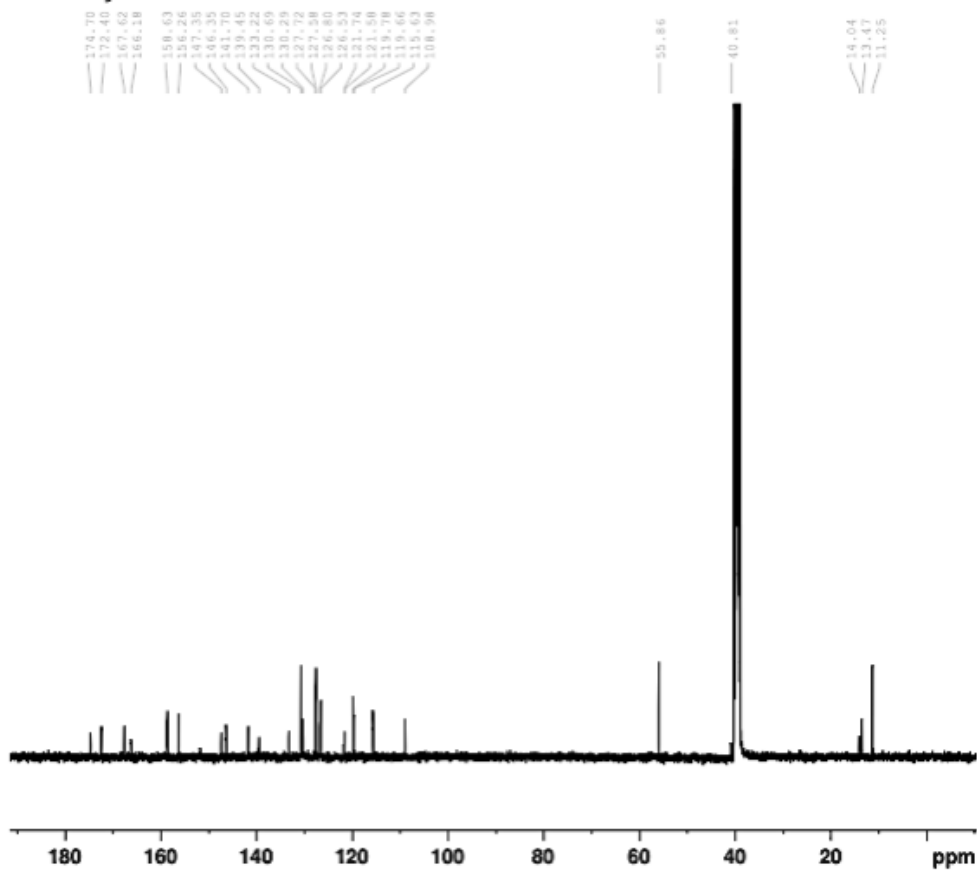

Cc1nc2cc(ccc2o1)CC(=O)NN=Cc3ccc(NC(=O)c4cc(O)oc4)cc3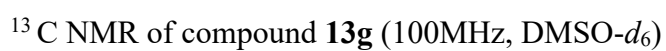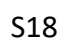

$^1\text{H}$  NMR of compound **13h** (400MHz, DMSO- $d_6$ )

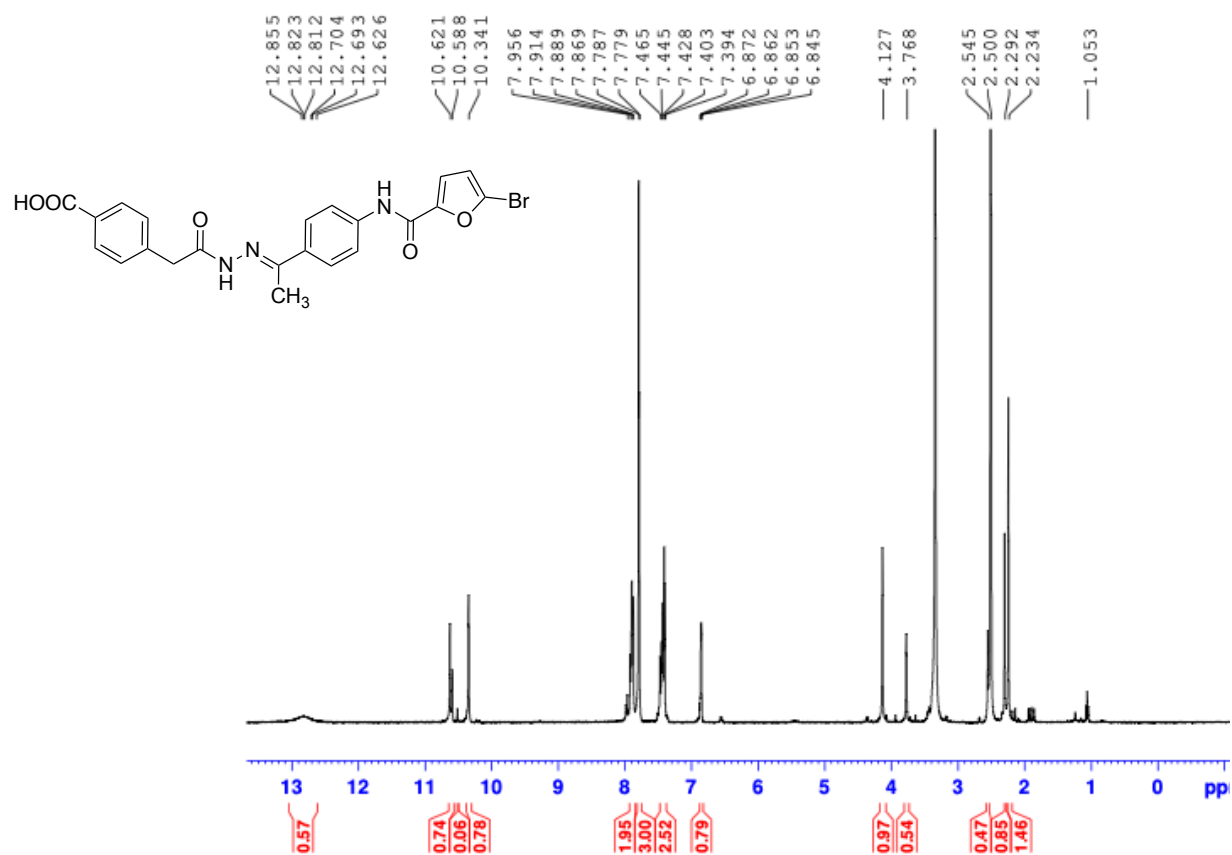

$^{13}\text{C}$  NMR of compound **13h** (100MHz, DMSO- $d_6$ )

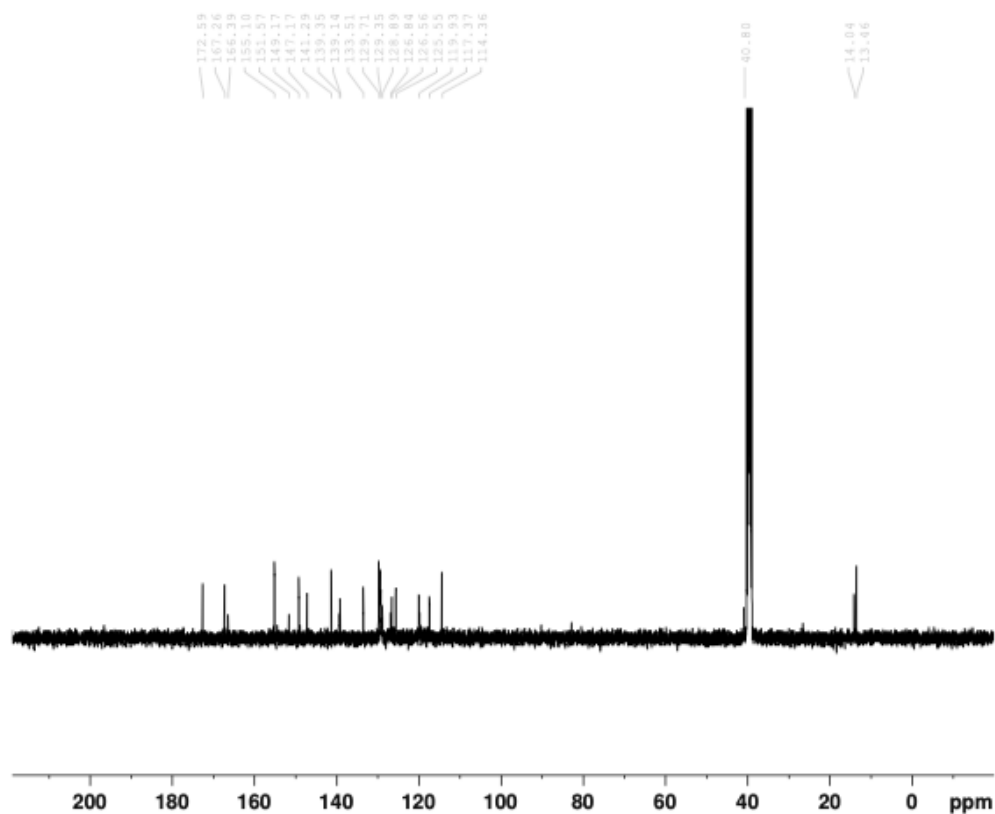

$^1\text{H}$  NMR of compound **13i** (400MHz,  $\text{DMSO}-d_6$ )

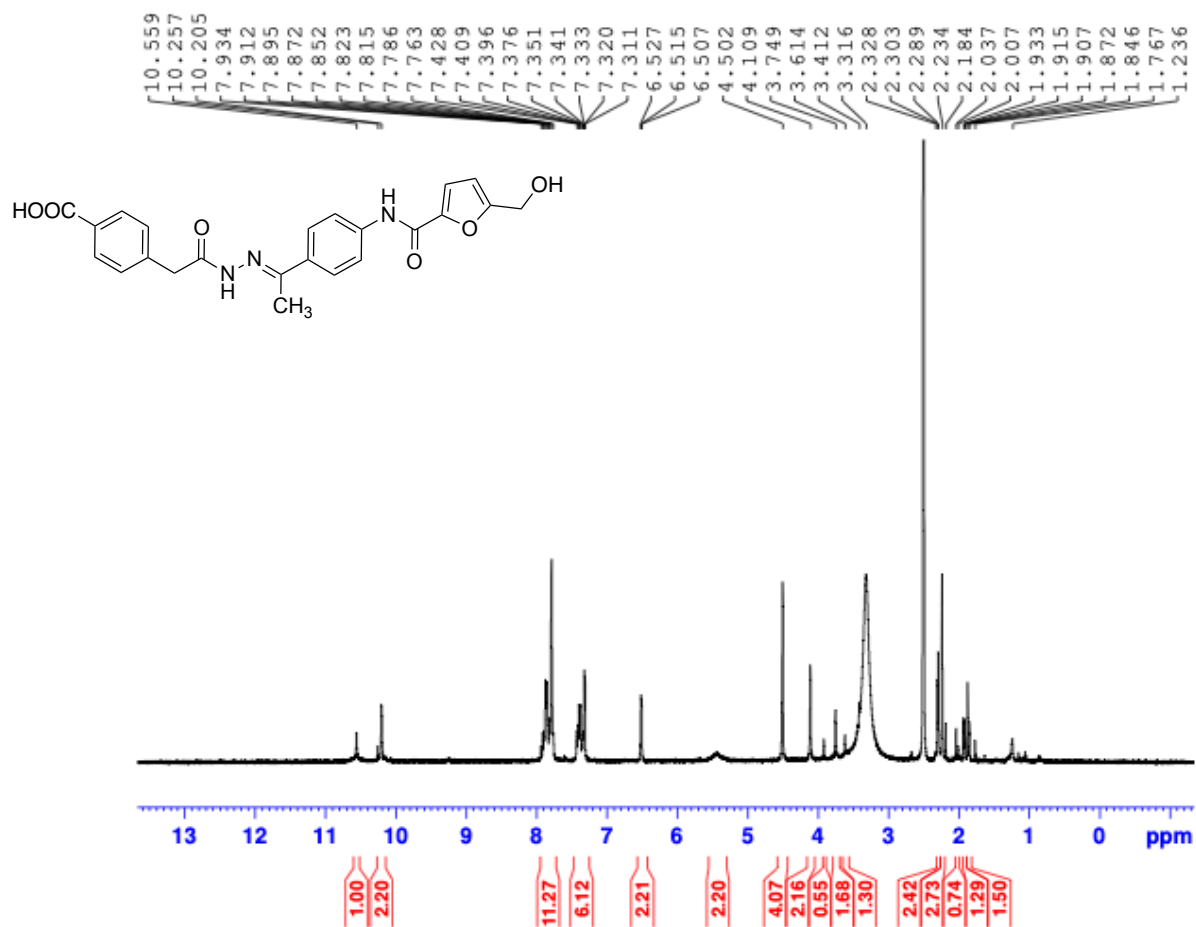

$^{13}\text{C}$  NMR of compound **13i** (100MHz,  $\text{DMSO}-d_6$ )

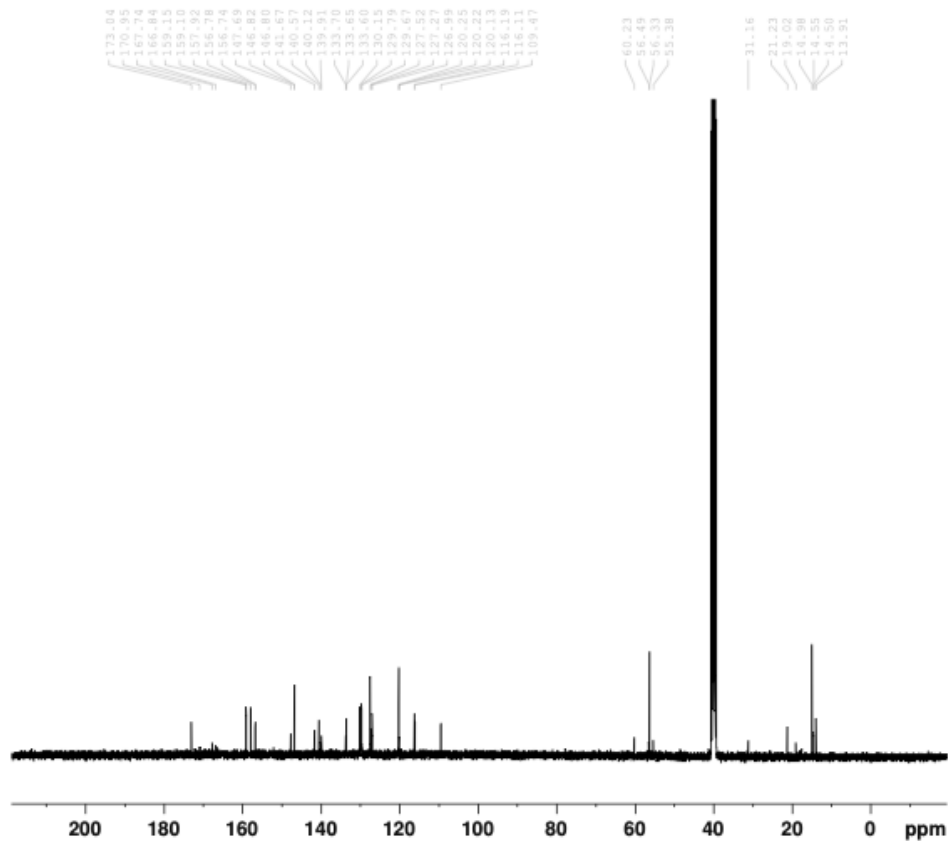

$^1\text{H}$  NMR of compound **13I** (400MHz,  $\text{DMSO}-d_6$ )

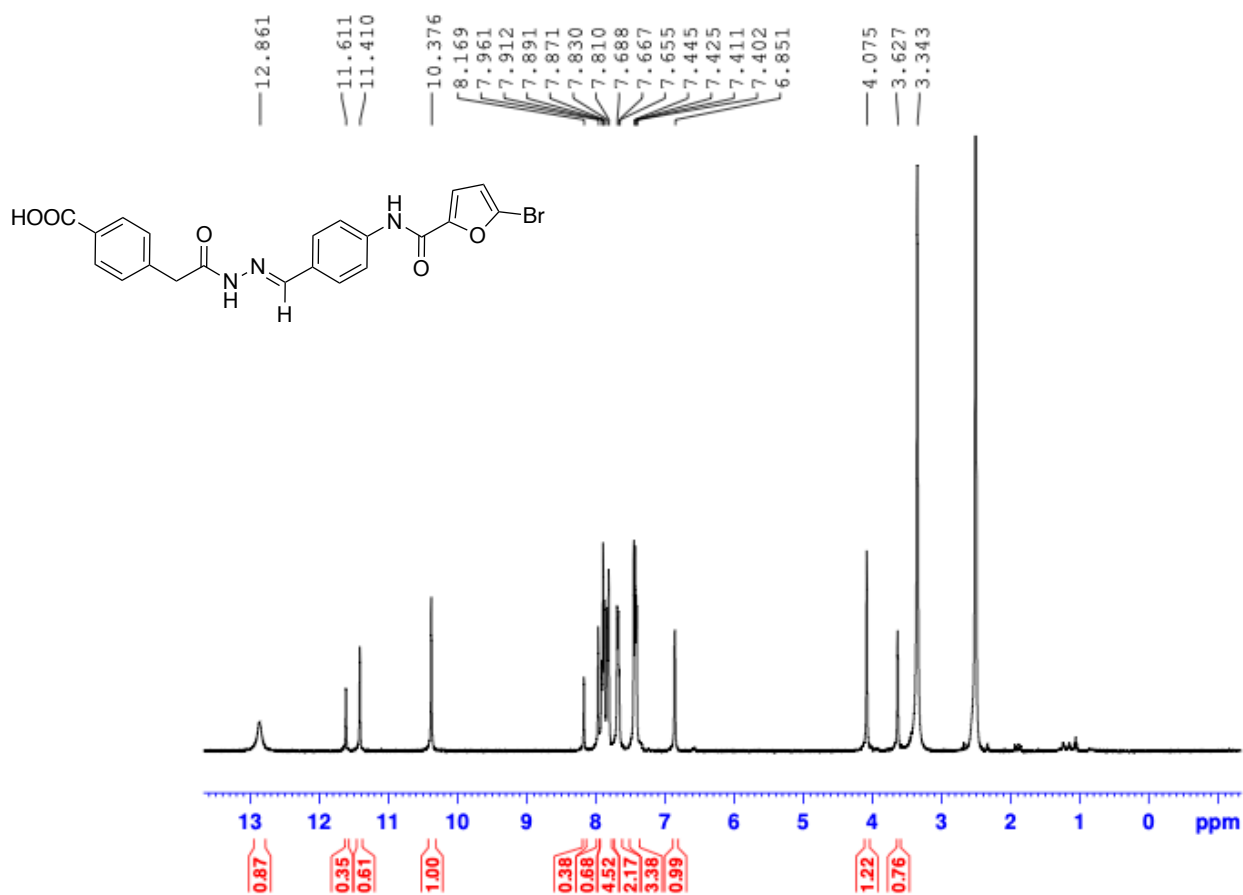

$^{13}\text{C}$  NMR of compound **13I** (100MHz,  $\text{DMSO}-d_6$ )

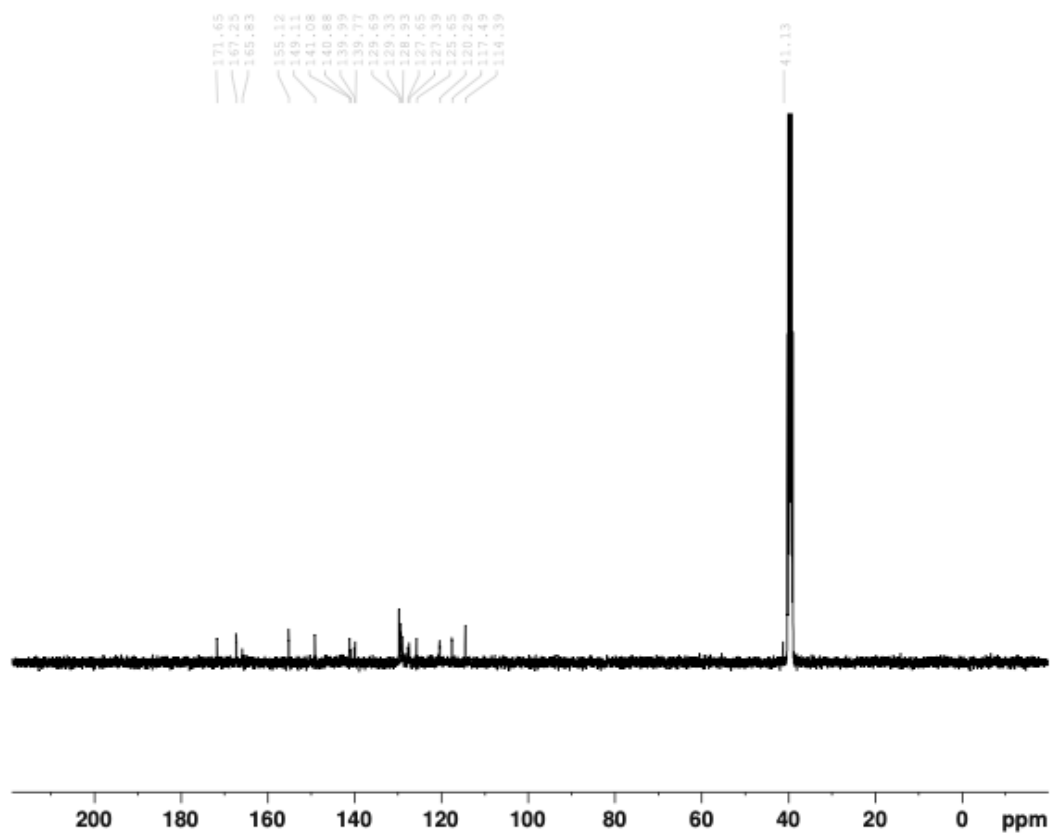

$^1\text{H}$  NMR of compound **13m** (400MHz,  $\text{DMSO}-d_6$ )

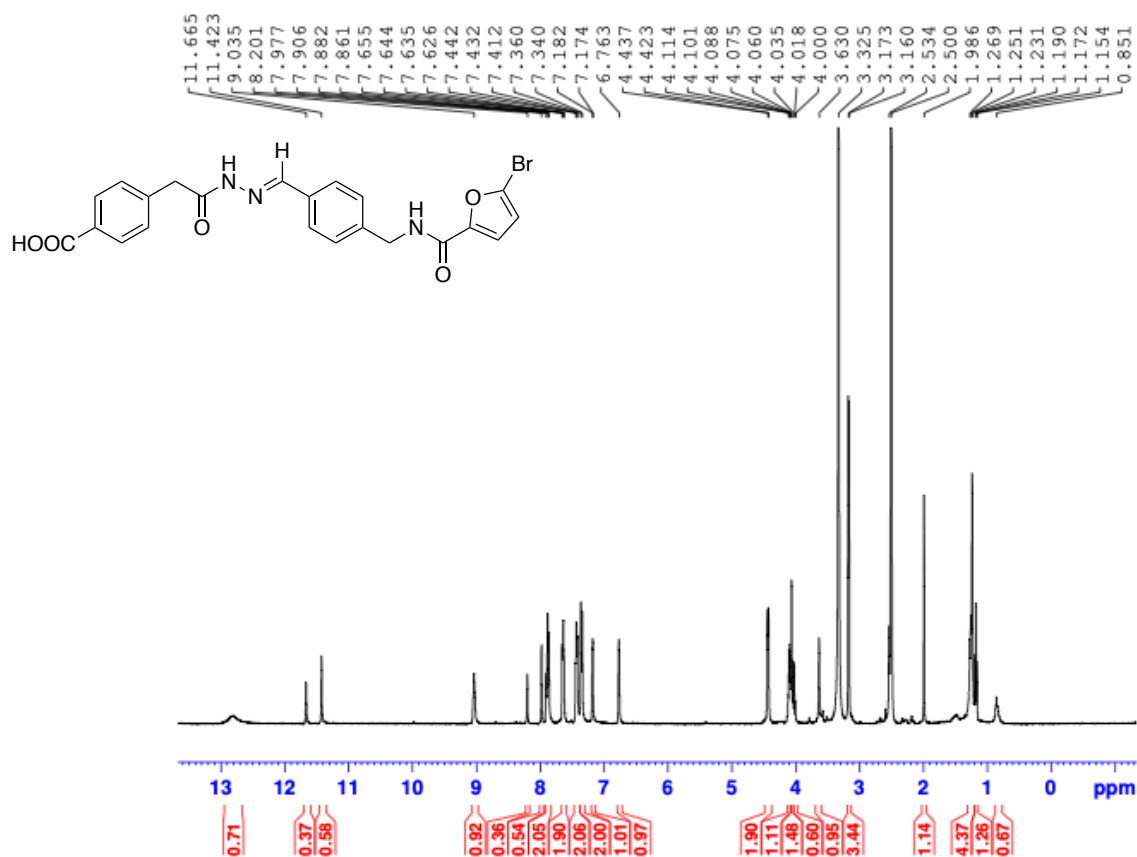

$^{13}\text{C}$  NMR of compound **13m** (100MHz,  $\text{DMSO}-d_6$ )

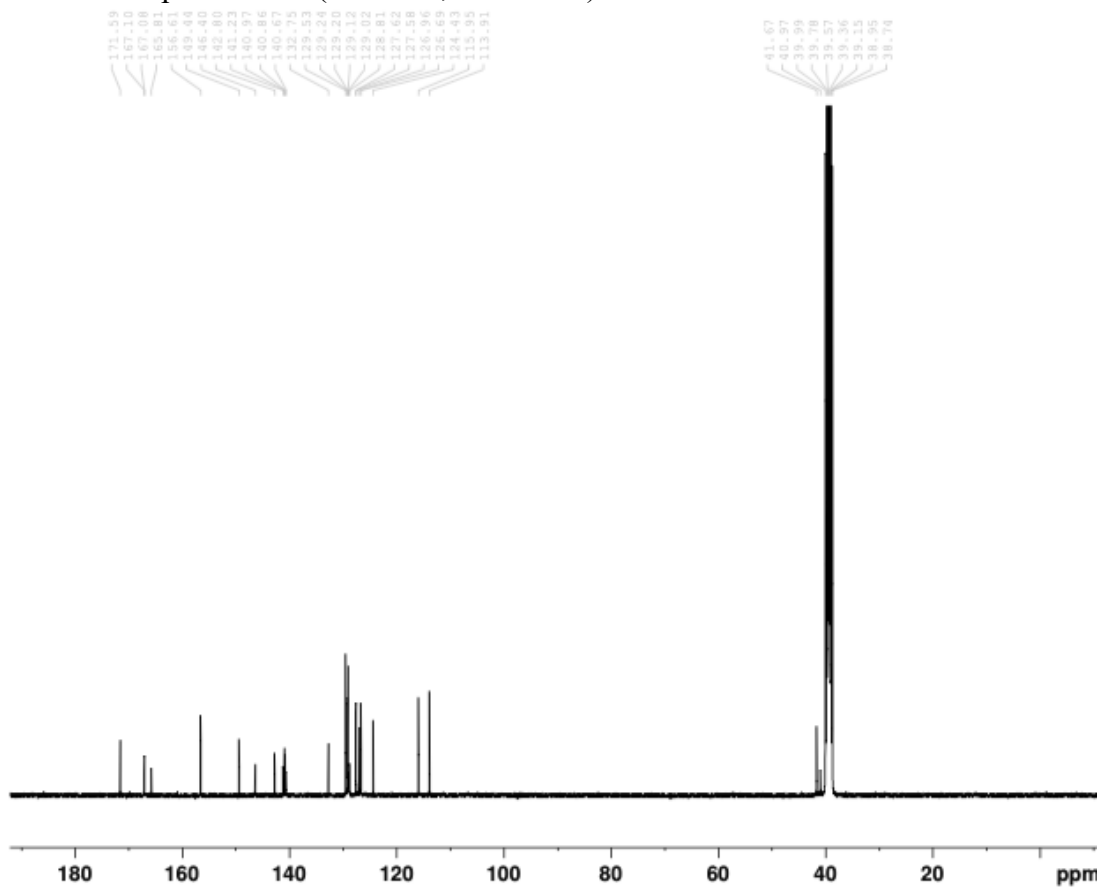

$^1\text{H}$  NMR of compound **13n** (400MHz, DMSO- $d_6$ )

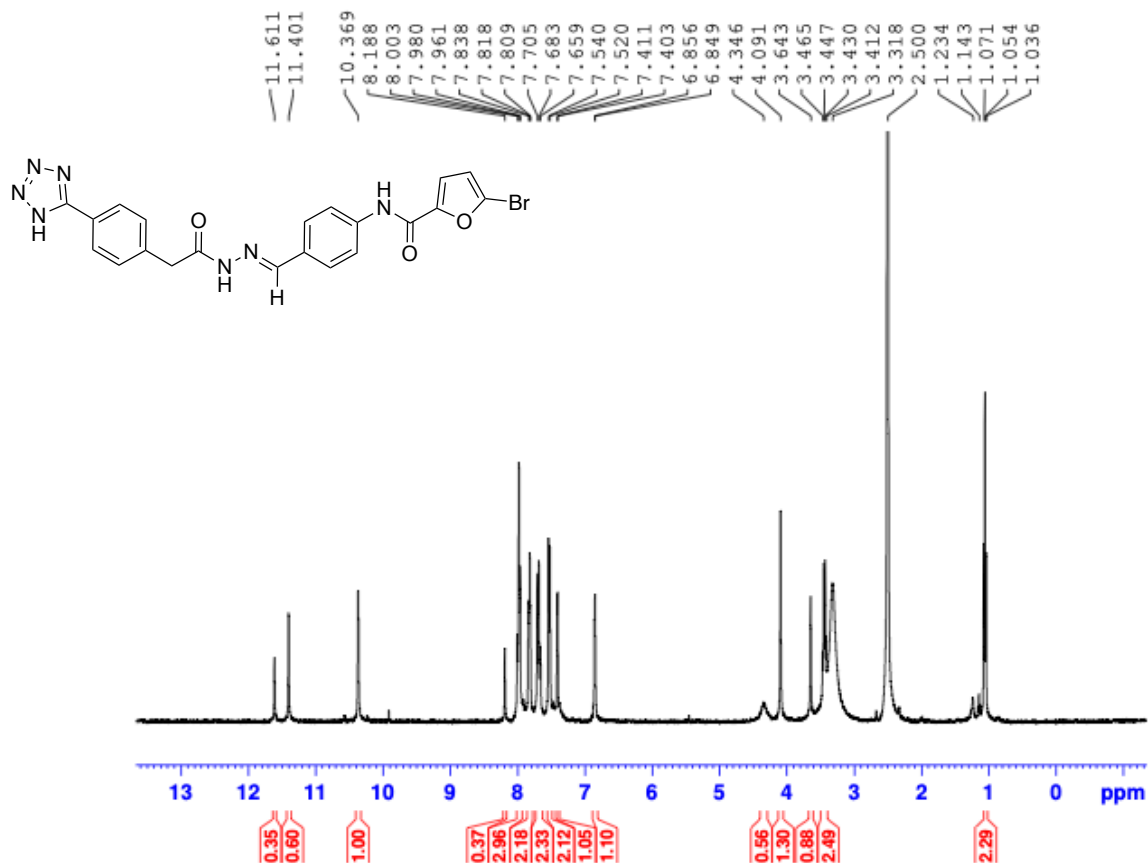

$^{13}\text{C}$  NMR of compound **13n** (100MHz, DMSO- $d_6$ )

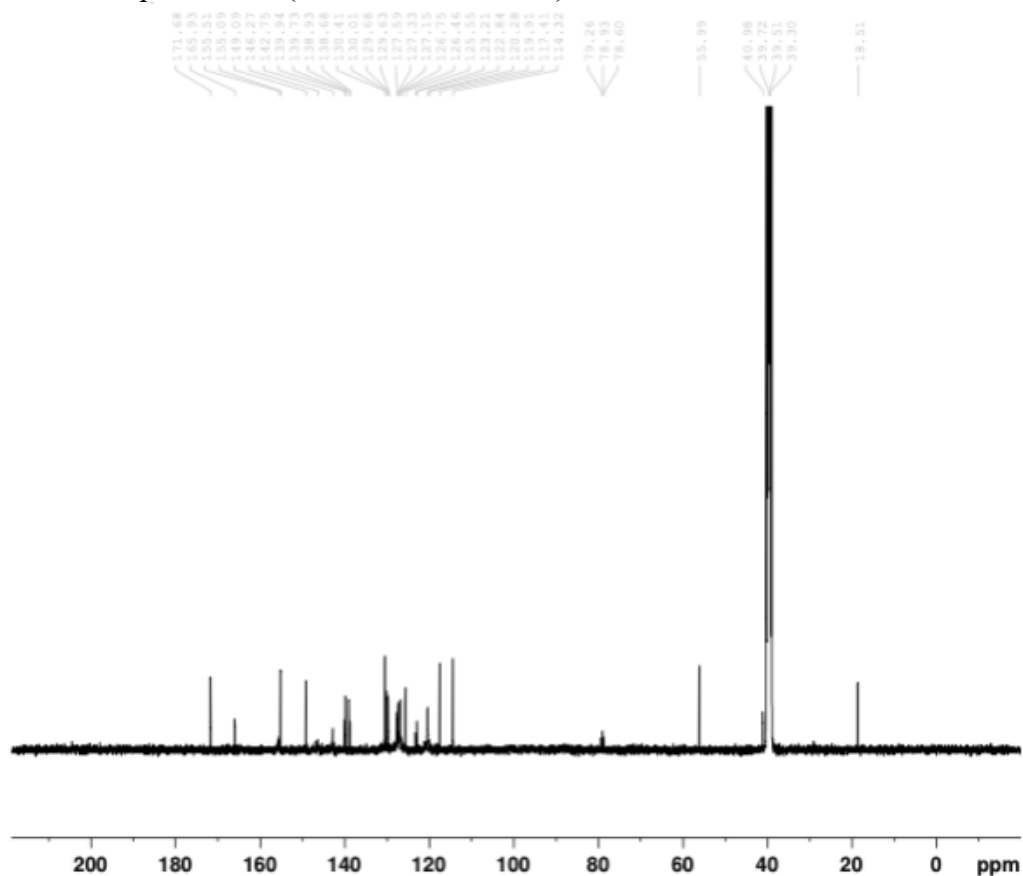

$^1\text{H}$  NMR of compound **13o** (400MHz, DMSO- $d_6$ )

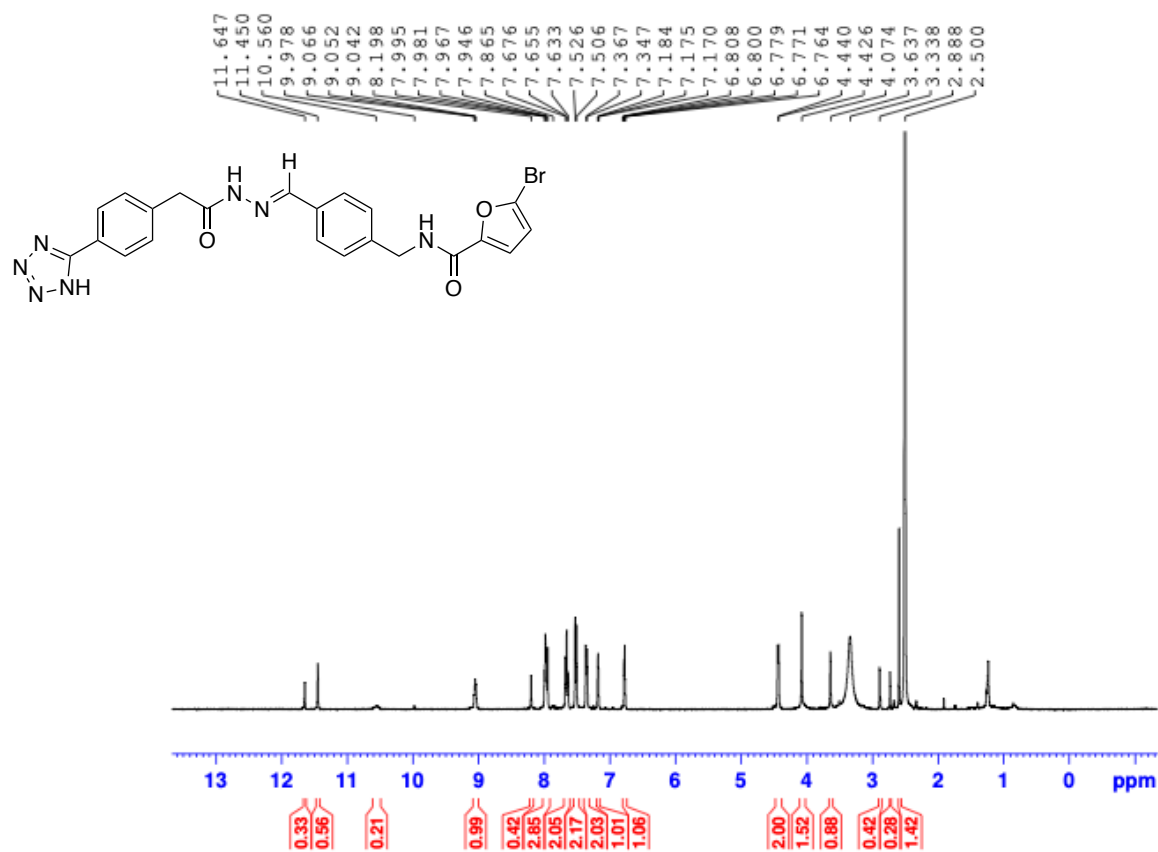

$^{13}\text{C}$  NMR of compound **13o** (100MHz, DMSO- $d_6$ )

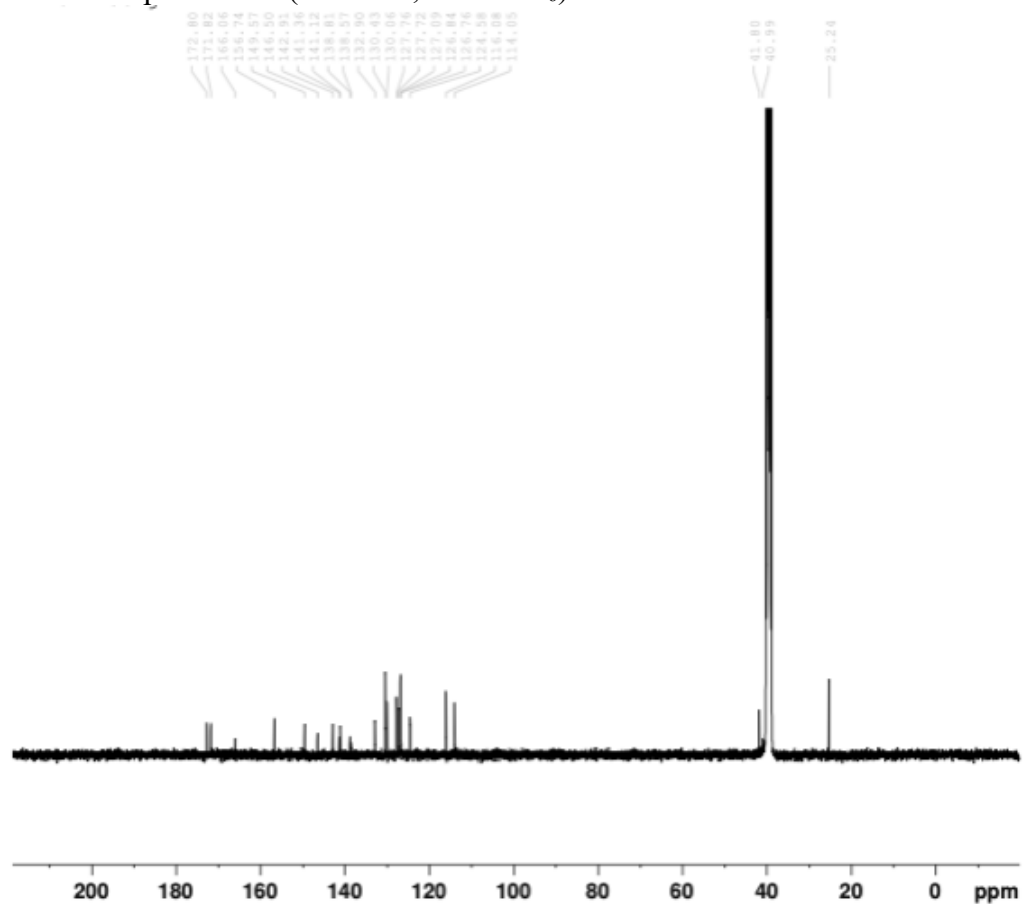



## V. Representative HRMS spectra

### HRSM spectrum of compound **13**

AK #189 RT: 1.85 AV: 1 NL: 1.66E8  
T: FTMS - p ESI Full ms [150.0000-1000.0000]

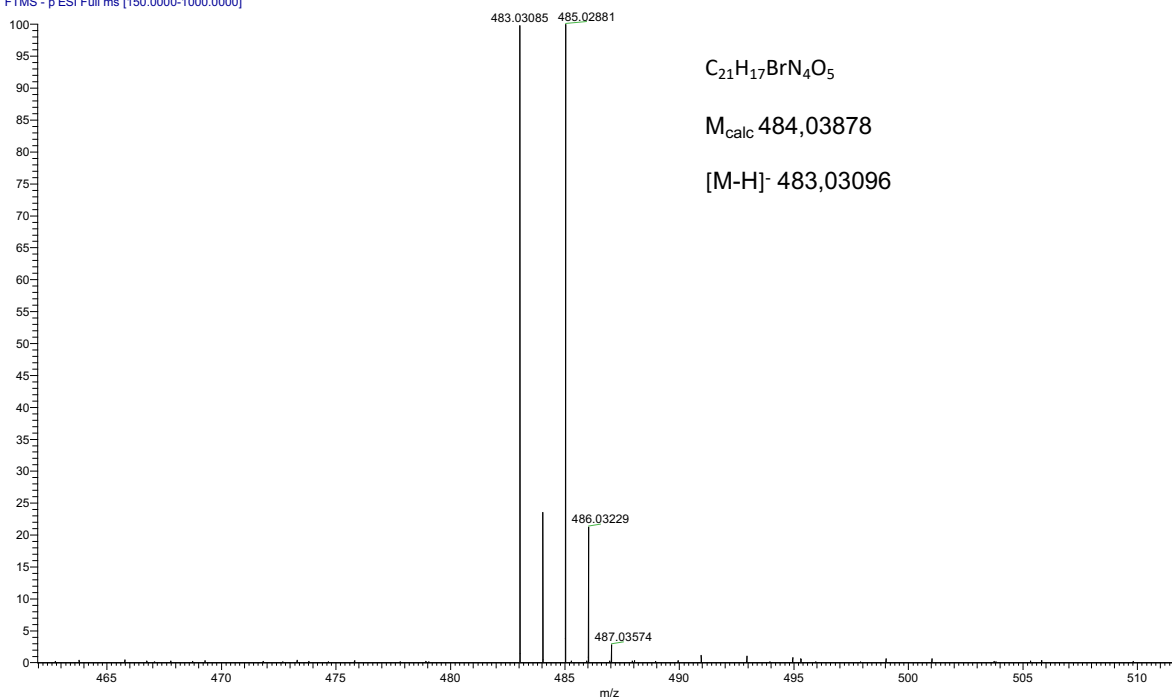

### HRSM spectrum of compound **13a**

DC298 #1 RT: 0.01 AV: 1 NL: 6.35E6  
T: FTMS - p ESI Full ms [150.0000-1000.0000]

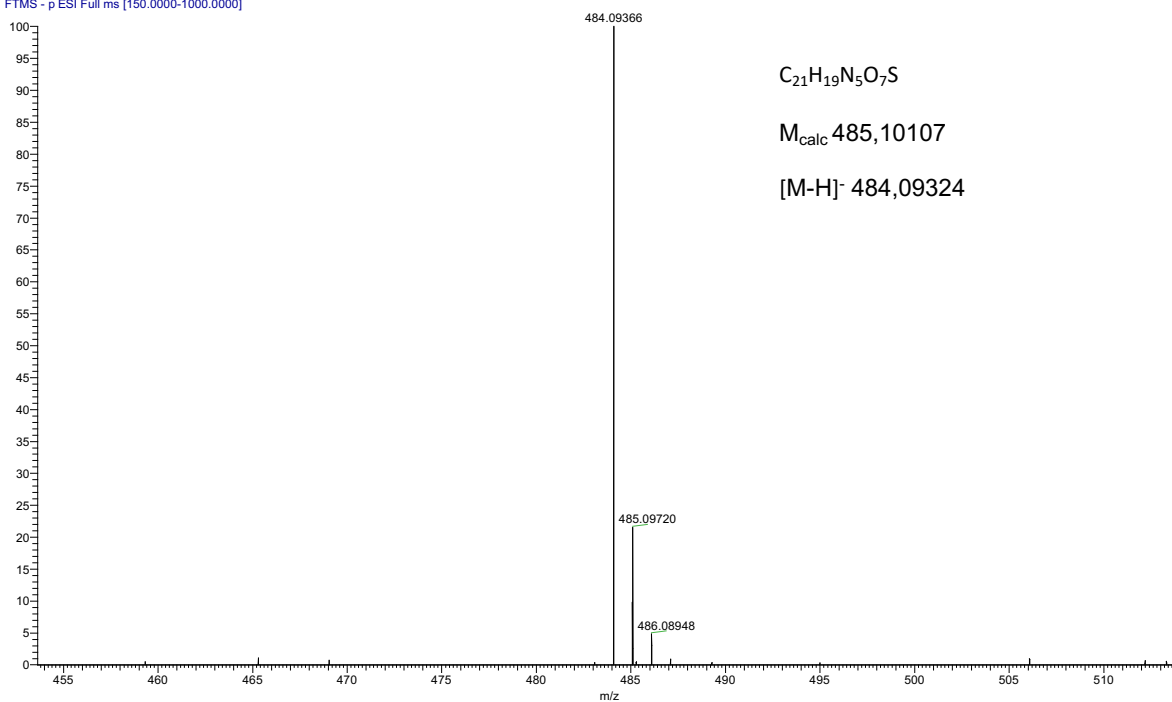

## HRSM spectrum of compound **13b**

BLB50 #389 RT: 2.14 AV: 1 NL: 1.54E8  
T: FTMS - p ESI Full ms [150.0000-800.0000]

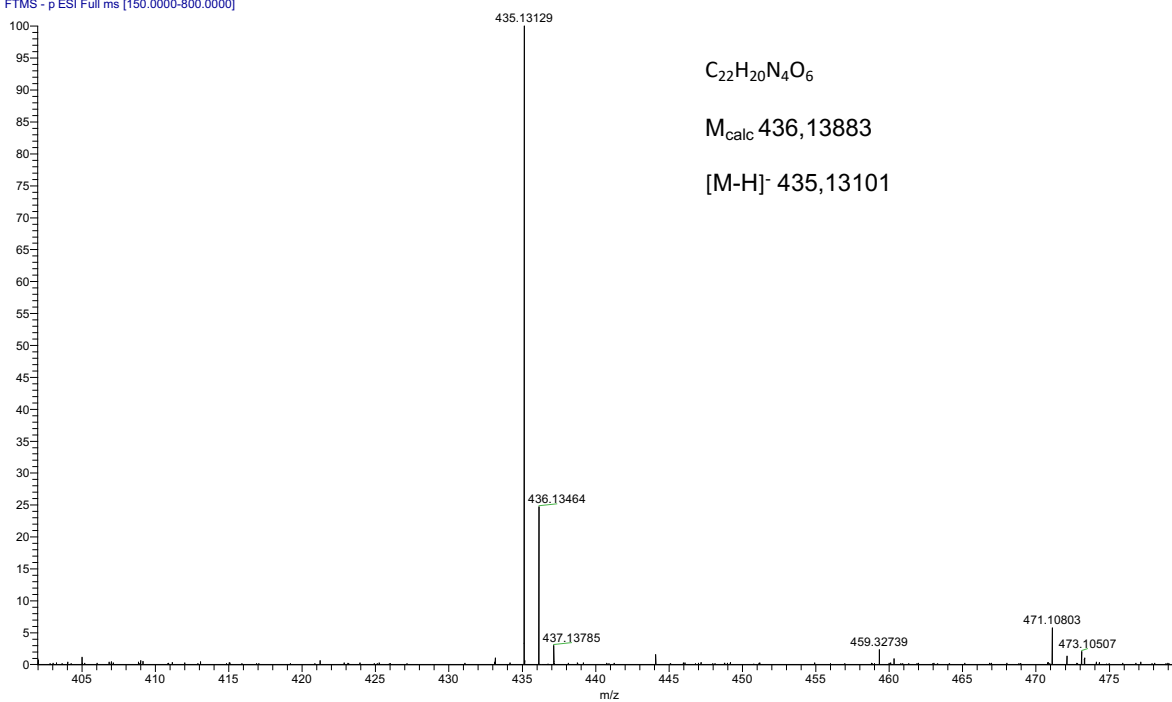

$C_{22}H_{20}N_4O_6$

$M_{calc}$  436,13883

$[M-H]^-$  435,13101

## HRSM spectrum of compound **13c**

TF3 #92 RT: 0.89 AV: 1 NL: 6.32E7  
T: FTMS - p ESI Full ms [150.0000-1000.0000]

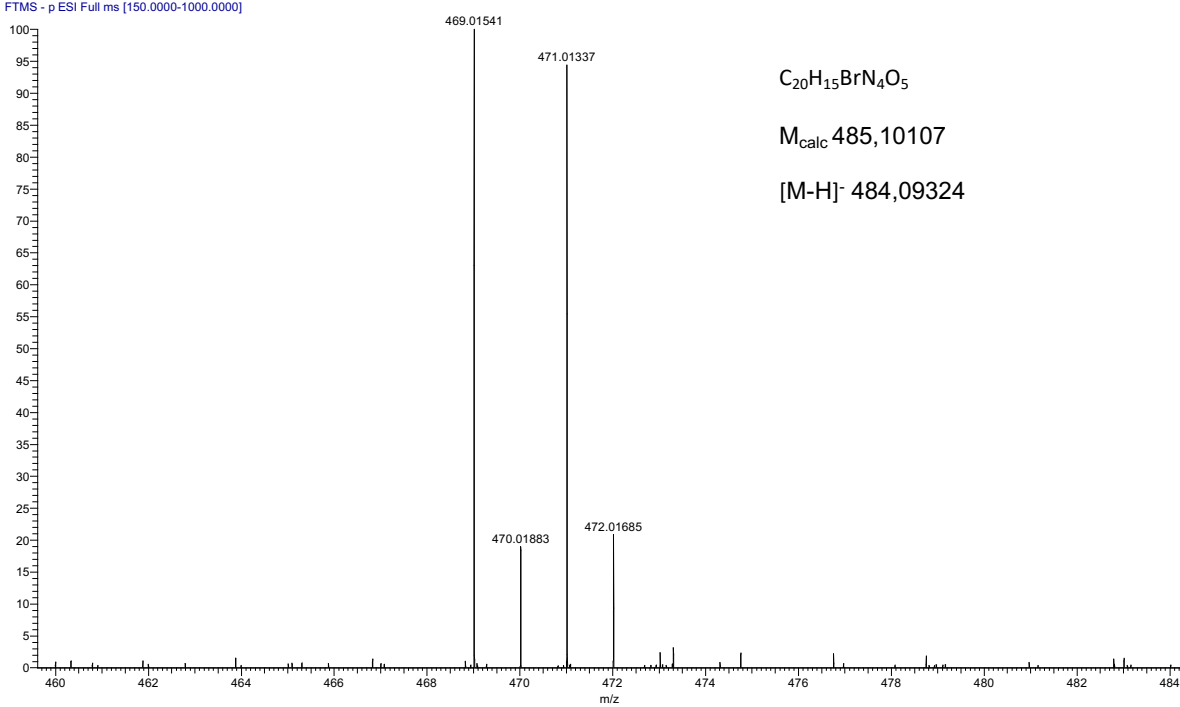

$C_{20}H_{15}BrN_4O_5$

$M_{calc}$  485,10107

$[M-H]^-$  484,09324

## HRSM spectrum of compound **13d**

TF7 #23 RT: 0.21 AV: 1 NL: 1.55E8  
T: FTMS - p ESI Full ms [150.0000-1000.0000]

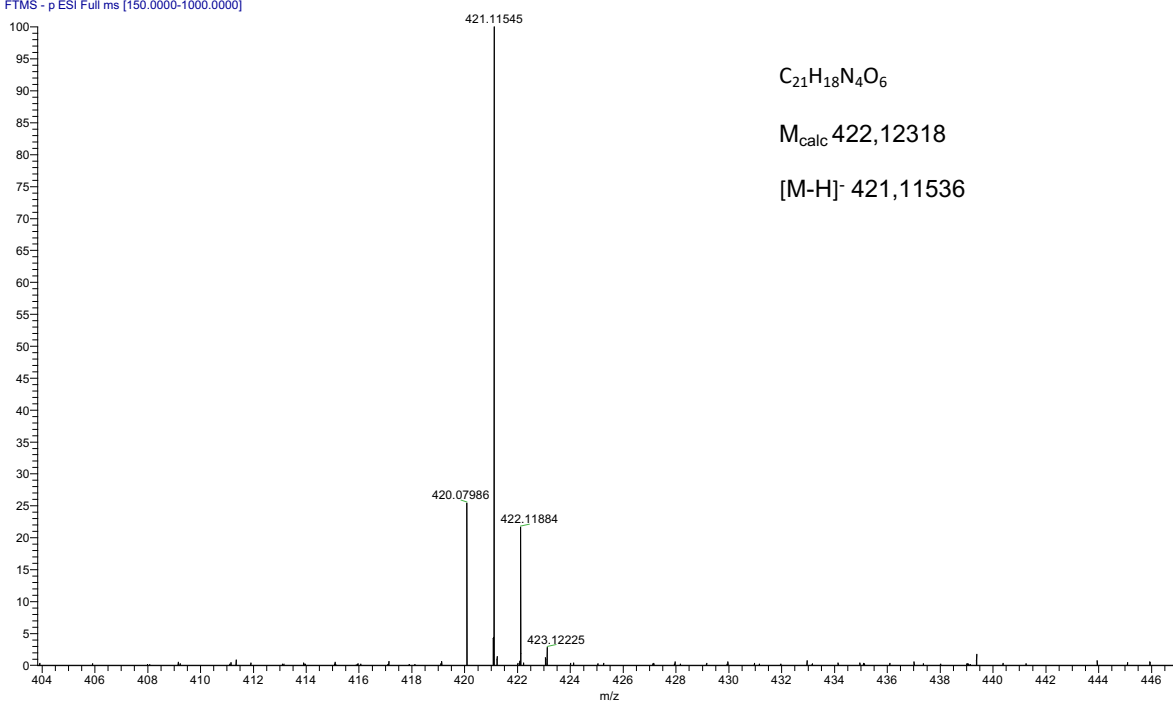

$C_{21}H_{18}N_4O_6$

$M_{\text{calc}}$  422,12318

$[M-H]^-$  421,11536

## HRSM spectrum of compound **13e**

BLB51 #26 RT: 0.25 AV: 1 NL: 6.21E7  
T: FTMS - p ESI Full ms [150.0000-1000.0000]

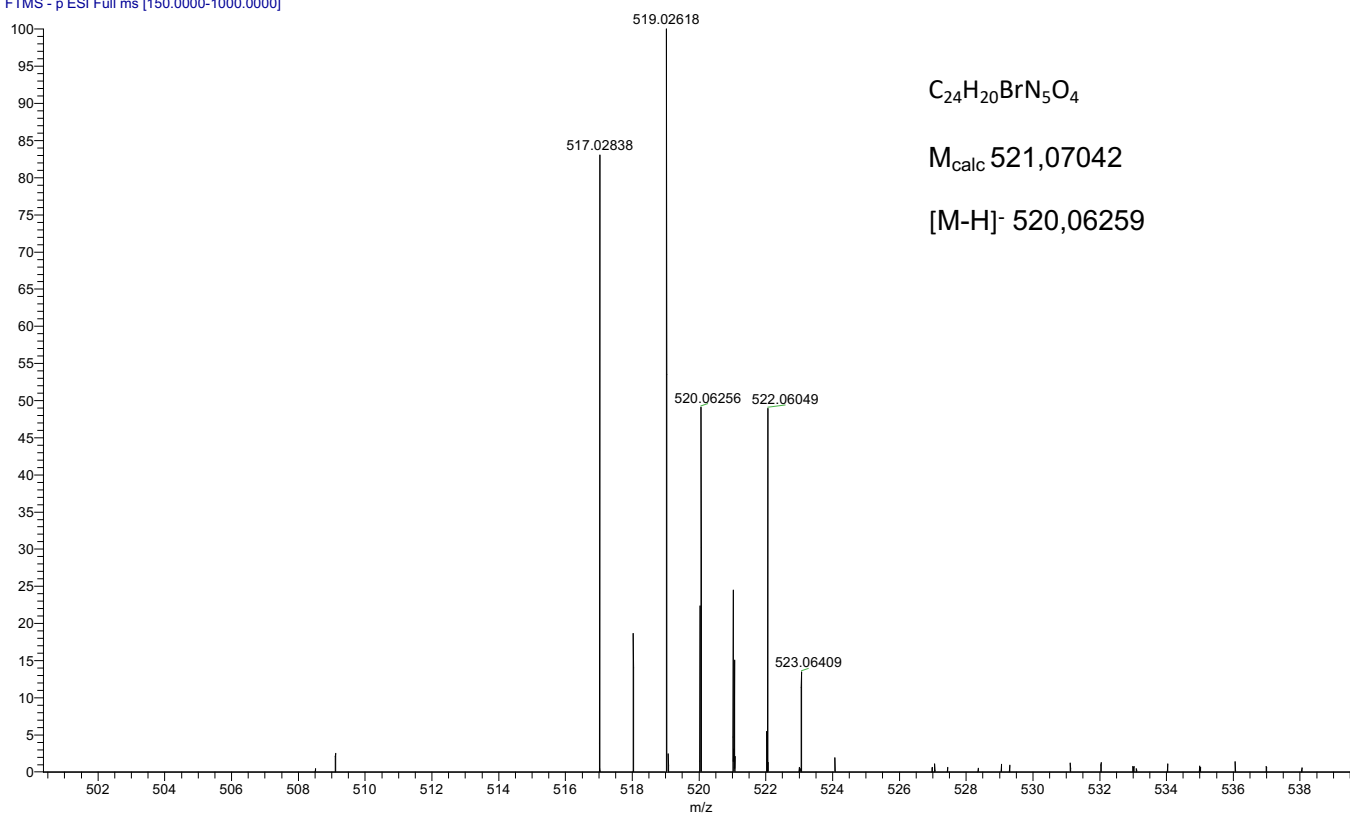

$C_{24}H_{20}BrN_5O_4$

$M_{\text{calc}}$  521,07042

$[M-H]^-$  520,06259

### HRSM spectrum of compound **13f**

DC294 #5 RT: 0.05 AV: 1 NL: 6.17E7  
T: FTMS - p ESI Full ms [150.0000-1000.0000]

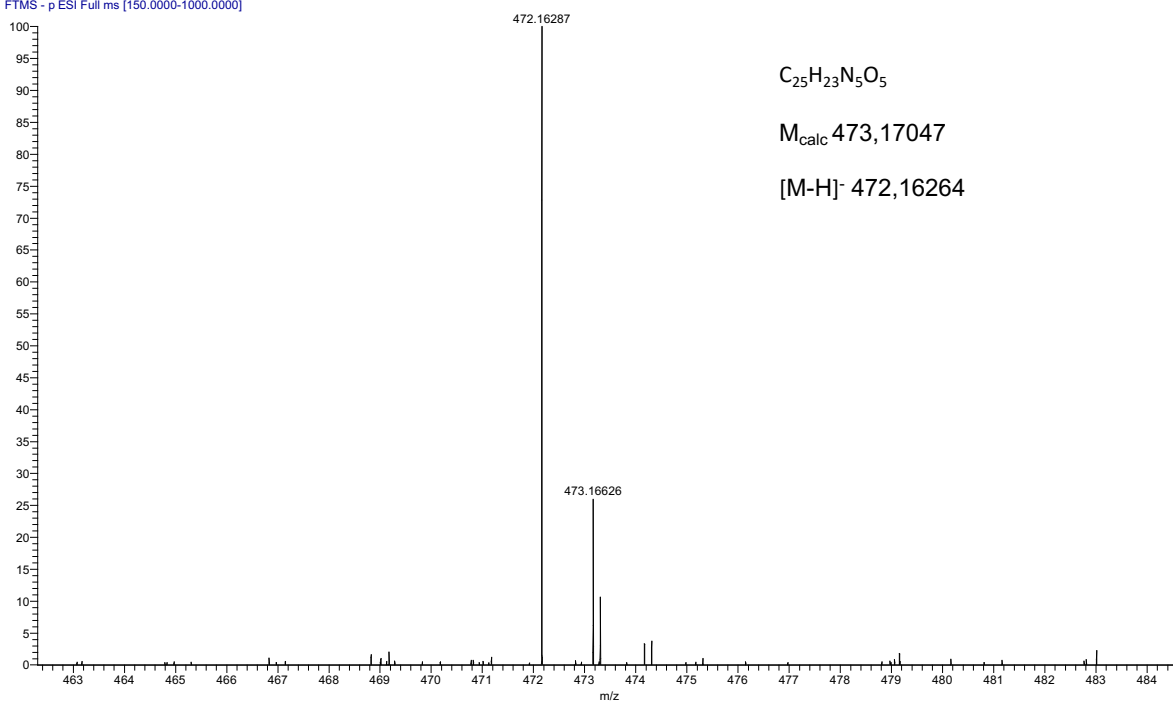

### HRSM spectrum of compound **13g**

TF14 #1 RT: 0.01 AV: 1 NL: 1.58E8  
T: FTMS - p ESI Full ms [150.0000-1000.0000]

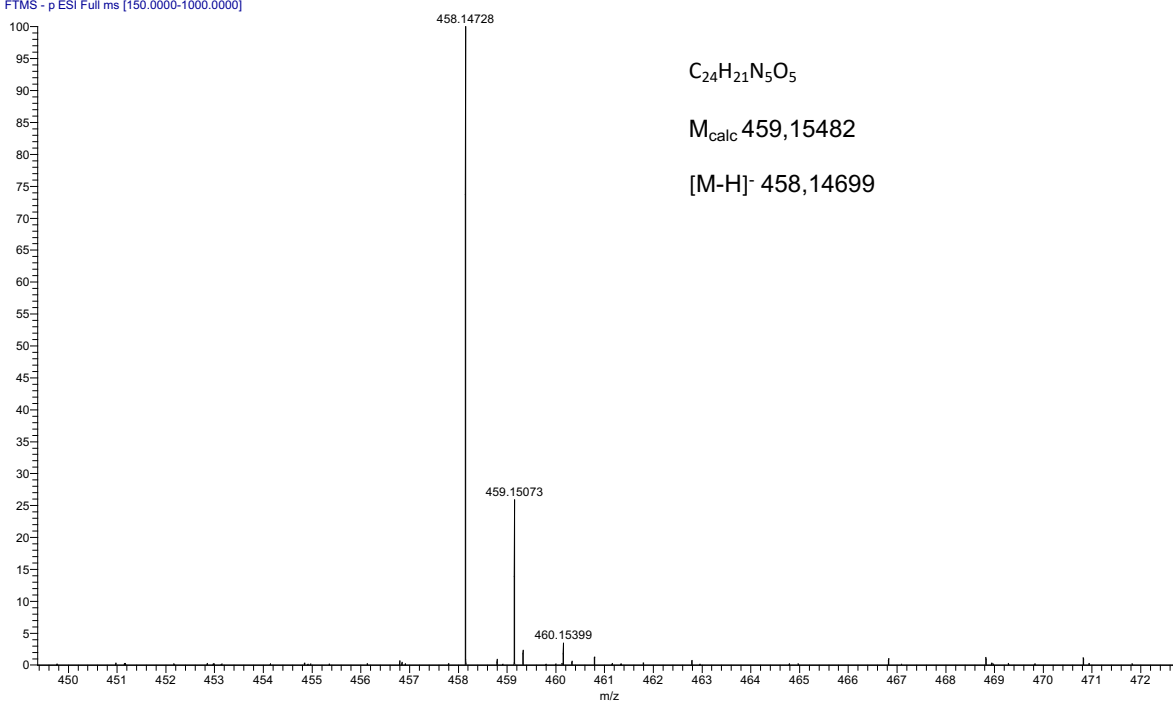

## HRSM spectrum of compound 13h

BLB18 #20 RT: 0.20 AV: 1 NL: 3.27E7  
T: FTMS - p ESI Full ms [150.0000-800.0000]

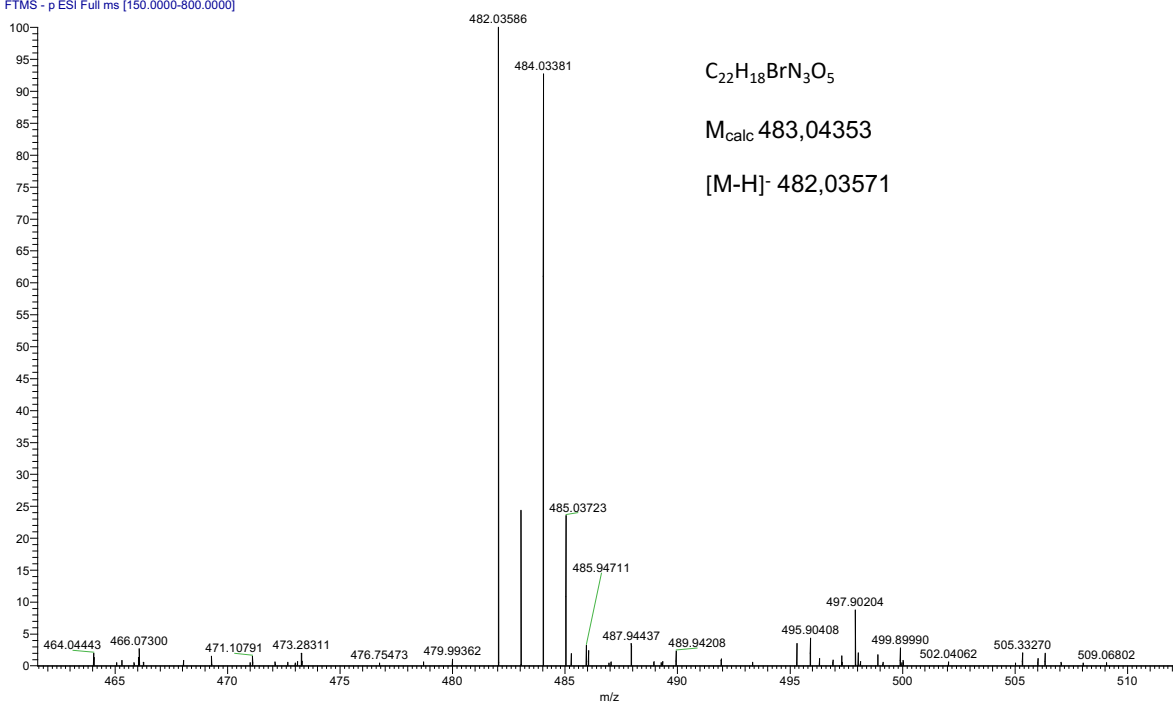

# HRSM spectrum of compound **13i**

DC295 #1 RT: 0.01 AV: 1 NL: 1.34E8  
T: FTMS - p ESI Full ms [150.0000-600.0000]

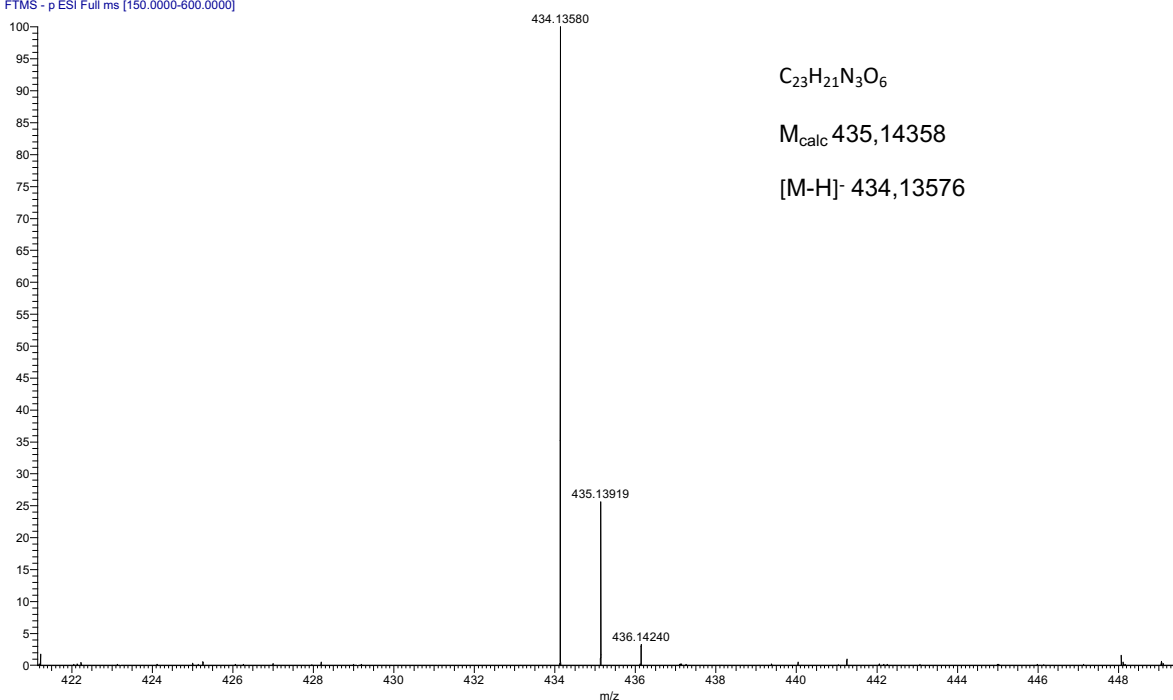

$C_{23}H_{21}N_3O_6$

$M_{calc}$  435,14358

$[M-H]^-$  434,13576

# HRSM spectrum of compound **13l**

BLB19 #619 RT: 5.95 AV: 1 NL: 4.13E7  
T: FTMS - p ESI Full ms [150.0000-1000.0000]

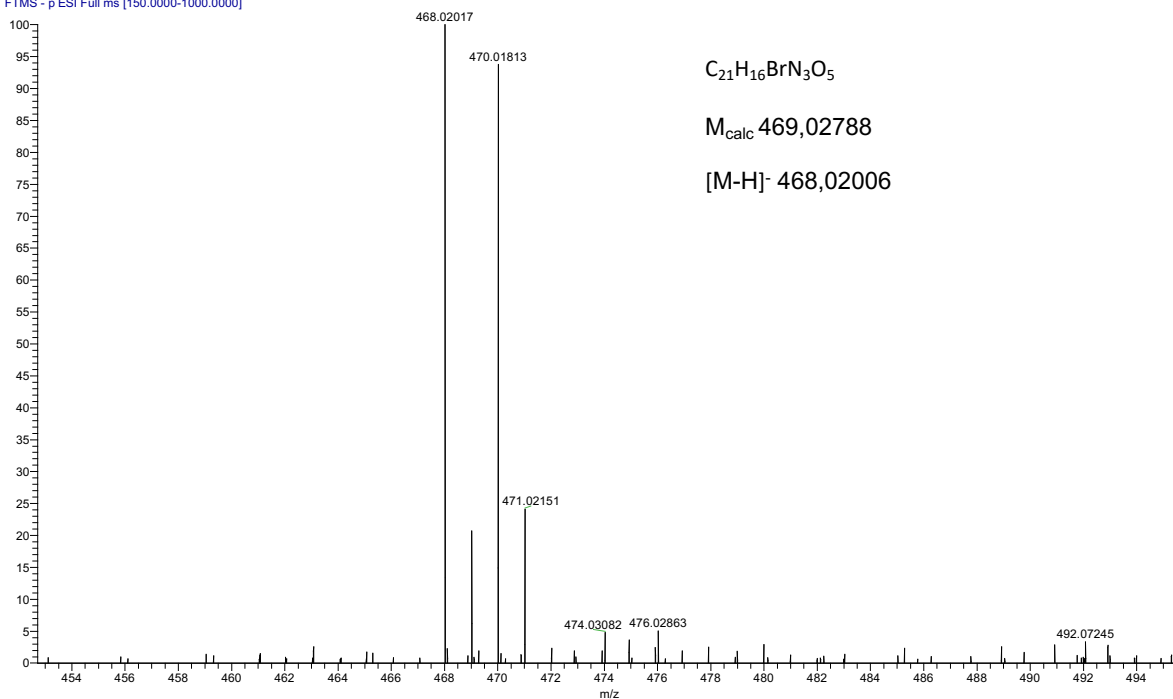

## HRSM spectrum of compound 13m

RDL124 #42 RT: 0.40 AV: 1 NL: 4.36E8  
T: FTMS - p ESI Full ms [150.0000-1000.0000]

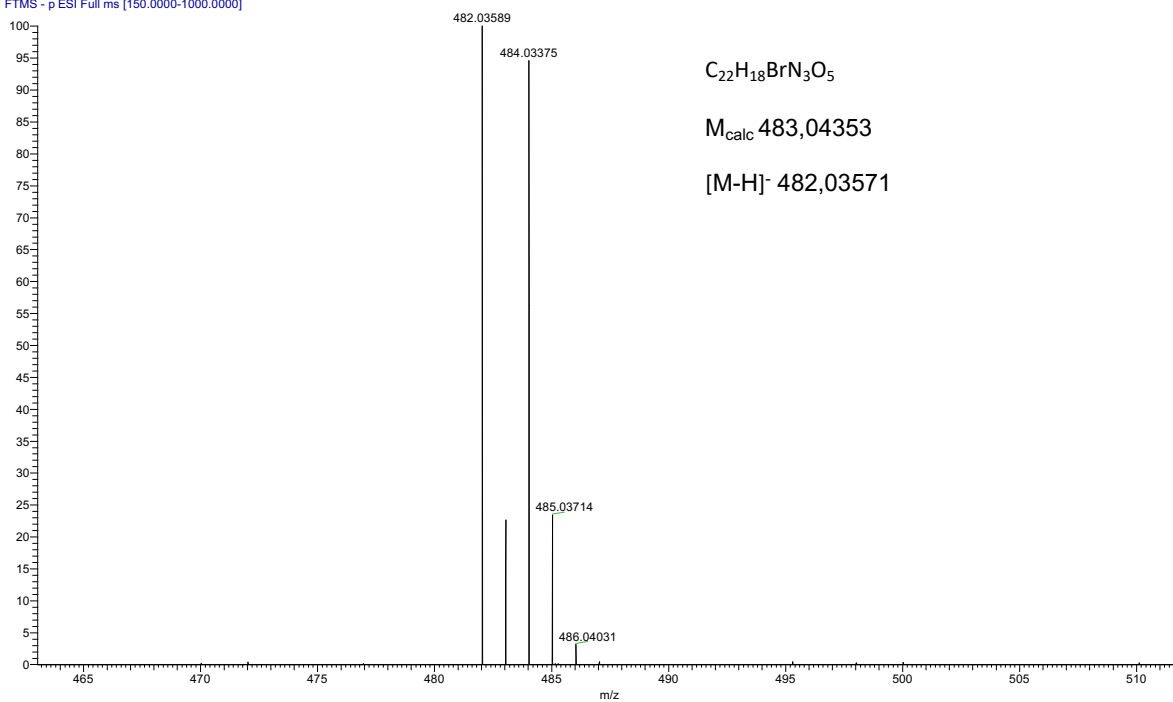

## HRSM spectrum of compound **13n**

BLB-29 #46 RT: 0.20 AV: 1 NL: 6.19E8  
T: FTMS - p ESI Full ms [150.0000-750.0000]

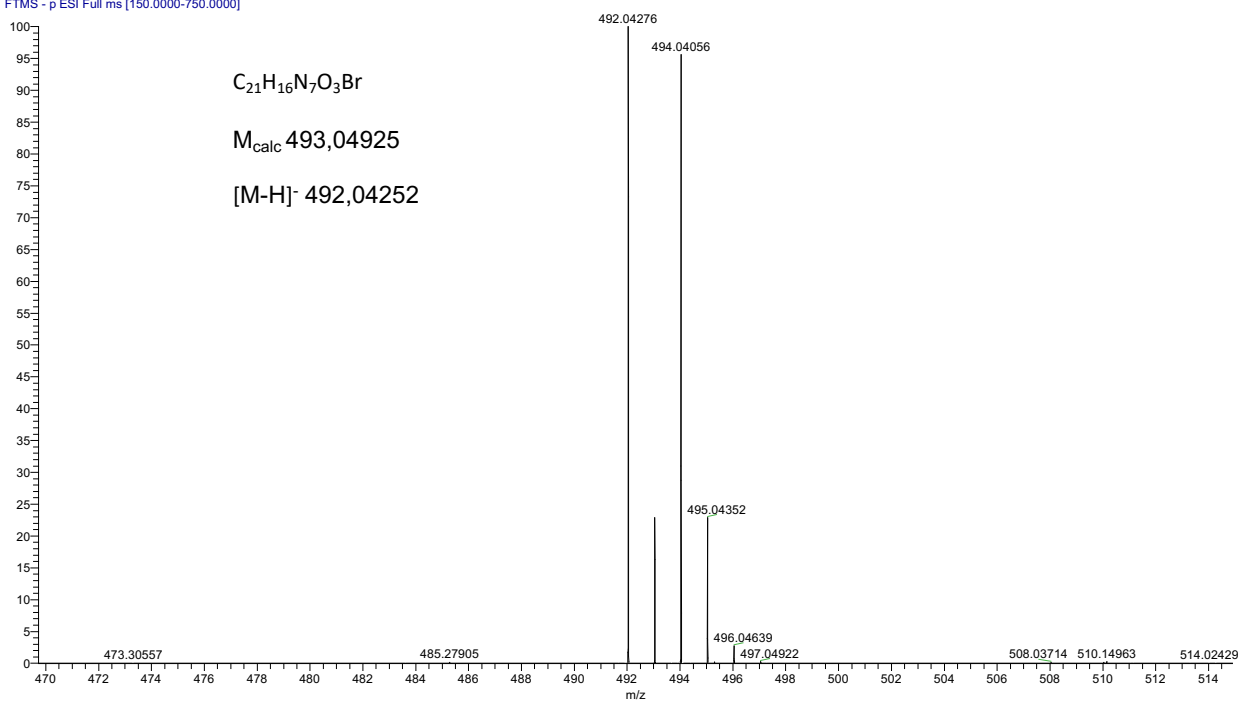

## HRSM spectrum of compound **13o**

RDL157 #215 RT: 1.54 AV: 1 NL: 2.50E8  
T: FTMS - p ESI Full ms [150.0000-1500.0000]

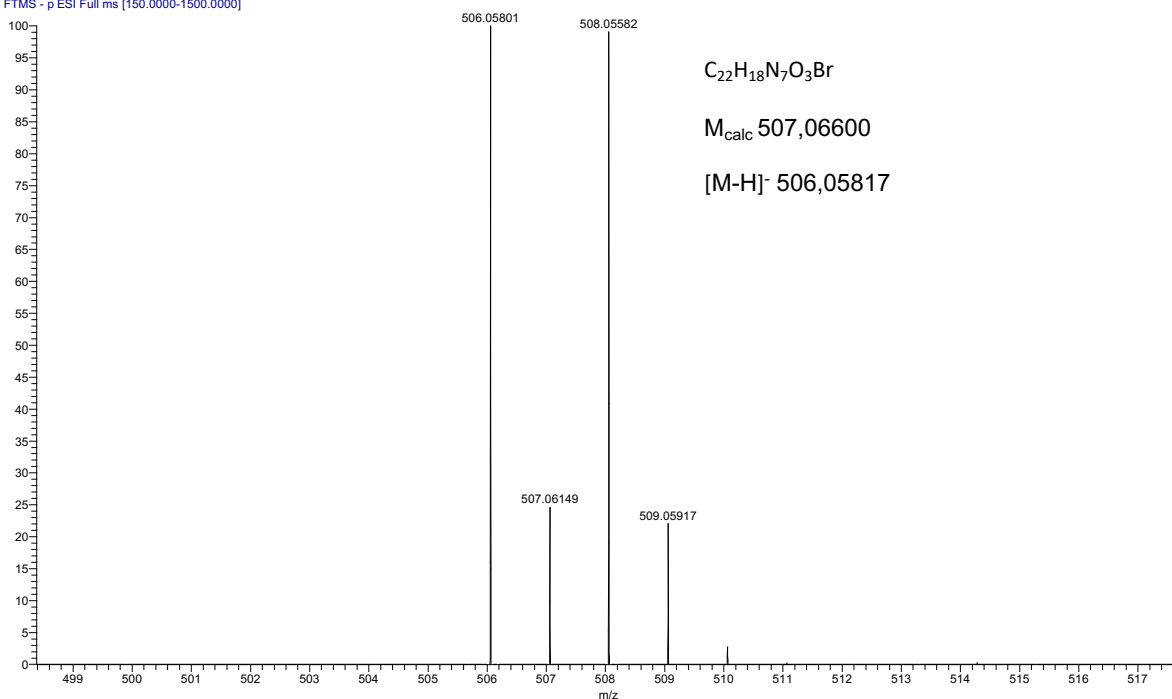

Supplement: s1 [file s1]
